# Supplementary material for: Long noncoding RNA miR503HG, a prognostic indicator, inhibits tumor metastasis by regulating the HNRNPA2B1/NF-κB pathway in hepatocellular carcinoma
Source: PubMed Central journal article supplement — Theranostics. 2018 Apr 15;8(10):2814–29. doi: 10.7150/thno.23012 (PMC5957011; doi:10.7150/thno.23012), 2018-04-15
Supplement: thnov08p2814s1.pdf [file thnov08p2814s1.pdf]

# **Long Noncoding RNA miR503HG, a Prognostic Indicator,**

## **Inhibits Tumor Metastasis by Regulating The**

### **HNRNPA2B1/NF- $\kappa$ B Pathway in Hepatocellular Carcinoma**

Hui Wang<sup>1, †</sup>, Linhui Liang<sup>2,3, †</sup>, Qiong Zhu Dong<sup>2,4, †</sup>, Lin Huan<sup>3</sup>, Jia He<sup>1</sup>, Botai Li<sup>1</sup>, Chen Yang<sup>1</sup>, Haojie Jin<sup>1</sup>, Lin Wei<sup>1</sup>, Chengtao Yu<sup>1</sup>, Fangyu Zhao<sup>1</sup>, Jinjun Li<sup>1</sup>, Ming Yao<sup>1</sup>, Wenxin Qin<sup>1\*</sup>, Lunxiu Qin<sup>2,4,5,\*</sup>, Xianghuo He<sup>2, 3, \*</sup>

<sup>1</sup> State Key Laboratory of Oncogenes and Related Genes, Shanghai Cancer Institute, Renji Hospital, Shanghai Jiao Tong University School of Medicine, Shanghai 200032, China;

<sup>2</sup> Institutes of Biomedical Sciences, Shanghai Medical College, Fudan University, Shanghai 200032, China;

<sup>3</sup> Fudan University Shanghai Cancer Center, Shanghai Medical College, Fudan University, Shanghai 200032, China

<sup>4</sup> Department of General Surgery, Huashan Hospital, Fudan University, Shanghai 200032, China

<sup>5</sup> Liver Cancer Institute, Zhongshan Hospital, Fudan University, Shanghai 200032, China

<sup>†</sup>These authors contributed equally to this work.

\*Correspondence: Xianghuo He, Ph.D., xhhe@fudan.edu.cn, Fudan University Shanghai Cancer Center and Institutes of Biomedical Sciences, Shanghai Medical College, Fudan University, 1207 Rm., 2# Bldg., 270 Dong An Rd., Shanghai 200032, China. Tel.: 86-21-34777577; Fax: 86-21-64172585; or Lunxiu Qin, M.D., qin\_lx@yahoo.com. Department of General Surgery, Huashan Hospital, Fudan University, 12 Wu Lu Mu Qi Road (M), Shanghai 200040, China. Tel & Fax: 86-21-5423 7960; or Wenxin Qin, Ph.D., wxqin@sjtu.edu.cn, State Key Laboratory of

Oncogenes and Related Genes, Shanghai Cancer Institute, Renji Hospital, Shanghai  
Jiao Tong University School of Medicine, No.25/Ln2200 Xie-Tu Road, Shanghai  
200032, China. Tel: 86-21-64436581; Fax: 86-21-64432142.

## Supplementary Materials and Methods

### 5' and 3' Rapid Amplification of cDNA Ends (RACE) analysis

5'RACE and 3'RACE analyses were performed with 5µg of total RNA. The SMARTer™ RACE cDNA kit (Clontech) was used according to the manufacturer's instructions. The gene-specific primers used for PCR are presented in Supplementary Table S5.

### Lentivirus production and infection

The miR503HG sequence was amplified and cloned into the pWPXL lentiviral vector (a gift from Dr. Didier Trono) to generate pWPXL-miR503HG. The primer sequences are shown in Supplementary Table S5. Lentiviral particles were harvested 48 h after HEK 293T cells were transfected with pWPXL-miR503HG, the packaging plasmid psPAX2 and the VSV-G envelope plasmid pMD2.G (a gift from Dr. Didier Trono) using Lipofectamine 2000 (Invitrogen, Carlsbad, CA). SMMC-7721 and Huh-7 cells were infected with recombinant lentiviral transducing units plus 6 µg/mL polybrene (Sigma, MA, USA).

### *In vitro* migration assays

For the transwell migration assays,  $5 \times 10^4$  cells were plated in the top chamber of each insert (BD Biosciences, MA, USA) with a non-coated membrane. For the invasion assays,  $1 \times 10^5$  cells were placed into the upper chamber with a Matrigel-coated membrane (BD Biosciences, MA, USA). After several hours of incubation at 37 °C, cells that migrated or invaded were fixed and stained in dye solution containing 0.1% crystal violet and 20% methanol. The number of cells that had migrated or invaded was counted and imaged using an IX71 inverted microscope (Olympus Corp, Tokyo,

Japan).

### ***In vivo* assays for metastasis**

For the metastasis assays,  $2 \times 10^6$  Huh7 cells were infected with the Lenti-miR503HG or the mock vector, suspended in 200 $\mu$ L of serum-free DMEM, and injected into nude mice through the tail vein (male BALB/c-nu/nu mice, 10 per group). After six weeks, the mice were sacrificed, and their lungs were dissected, fixed with phosphate-buffered neutral formalin, and prepared for standard histological examination. For the *in situ* exnograft assays,  $5 \times 10^6$  SMMC-7721 cells stably expressing miR503HG, together with stably expressing vector control, were suspended in 40 $\mu$ L of DMEM/Matrigel (1:1) for each mouse. Through an 8-mm transverse incision in the upper abdomen, each nude mouse was inoculated orthotopically in the left hepatic lobe with a microsyringe. After 8 weeks, mice were sacrificed, livers were dissected, fixed with phosphate-buffered neutral formalin, paraffin-embedded and prepared for standard histological examination. Mice were handled and housed according to protocols approved by the Shanghai Medical Experimental Animal Care Commission.

### **Luciferase reporter assay**

For the luciferase analysis of signaling pathway reporter vectors, HEK 293T knockdown of HNRNPA2B1 were seeded in 96-well plates at a density of 5,000 cells per well. After 24h, the cells were transiently transfected with 5ng of pRL-CMV Renilla luciferase reporter, 30ng of the pLUC vectors containing  $\beta$ -catenin, ERK, p53, NFAT, HSF, AP-1, IRF, CEBPA, MYC, NF- $\kappa$ B, and STAT3 consensus binding sequence, respectively. After 48 h, luciferase activities were measured using the dual-luciferase reporter assay system (Promega, Madison, WI, USA).

### **Oligonucleotide transfection**

Small interfering (si) RNA duplexes and miR503 mimics were designed and synthesized by Ribobio (Guangzhou, China). siRNAs, miRNA mimics, [inhibitors](#) and corresponding negative control (NC) were synthesized by the sequences used are shown in Supplementary Table S5. Cells were transfected using Lipofectamine 2000 according to the manufacturer's instructions.

### **Real-time PCR (qPCR)**

Total RNA was extracted from cells using Trizol reagent (Invitrogen) according to the manufacturer's instruction. A total of 1 $\mu$ g of RNA was subjected to reverse transcription using HiScript II Q RT SuperMix for qPCR (+gDNA wiper) (Vazyme Biotech, Nanjing, China) and real-time PCR was carried out using AceQ qPCR SYBR Green Master Mix (Vazyme Biotech, Nanjing, China). The PCR reaction conditions were as follows: 95  $^{\circ}$ C for 15s followed by 40 cycles of 95  $^{\circ}$ C for 5s and 60  $^{\circ}$ C for 30s. The expression levels were normalized against those of the internal reference gene  $\beta$ -actin, the relative expression levels were determined by the following equation:  $2^{-\Delta\Delta Ct}$  ( $\Delta Ct = \Delta Ct_{\text{target}} - \Delta Ct_{\beta\text{-actin}}$ ). A list of primers used for real-time PCR experiments were in Supplementary Table S5.

### **Western blot analysis**

Proteins from the cell lysates were prepared in 1 $\times$ sodium dodecyl sulfate buffer, separated by sodium dodecyl sulfate–polyacrylamide gel electrophoresis (SDS-PAGE) and transferred to a nitrocellulose membrane (Bio-Rad, Hercules, CA, USA). The membranes were blocked with 5% non-fat milk and incubated with the appropriate antibody. The antigen-antibody complex was detected with enhanced chemiluminescence reagents (Pierce, Rockford, IL). The antibodies used in this study

are shown in Supplementary Table S6.

## Supplementary Figures

### Supplementary Fig. S1

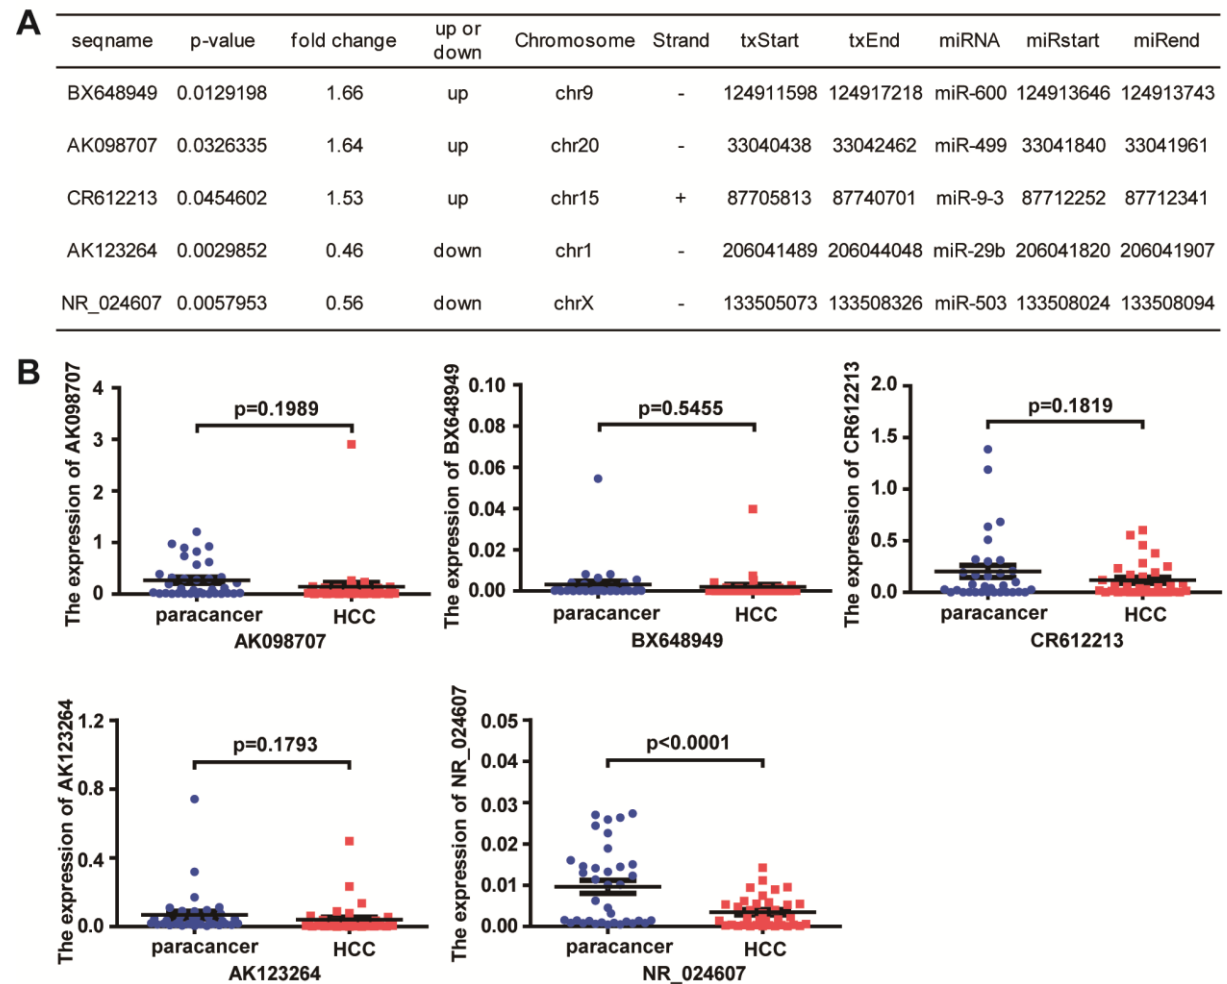

### Supplementary Fig. S1. Screening for lncRNAs as the host gene of miRNAs among the differentially expressed lncRNAs

(A) Five lncRNAs and miRNAs in the chromosomal locus. (B) The expression levels of five lncRNAs in 36 pairs of HCC tissues and corresponding noncancerous liver tissues.

## Supplementary Fig. S2

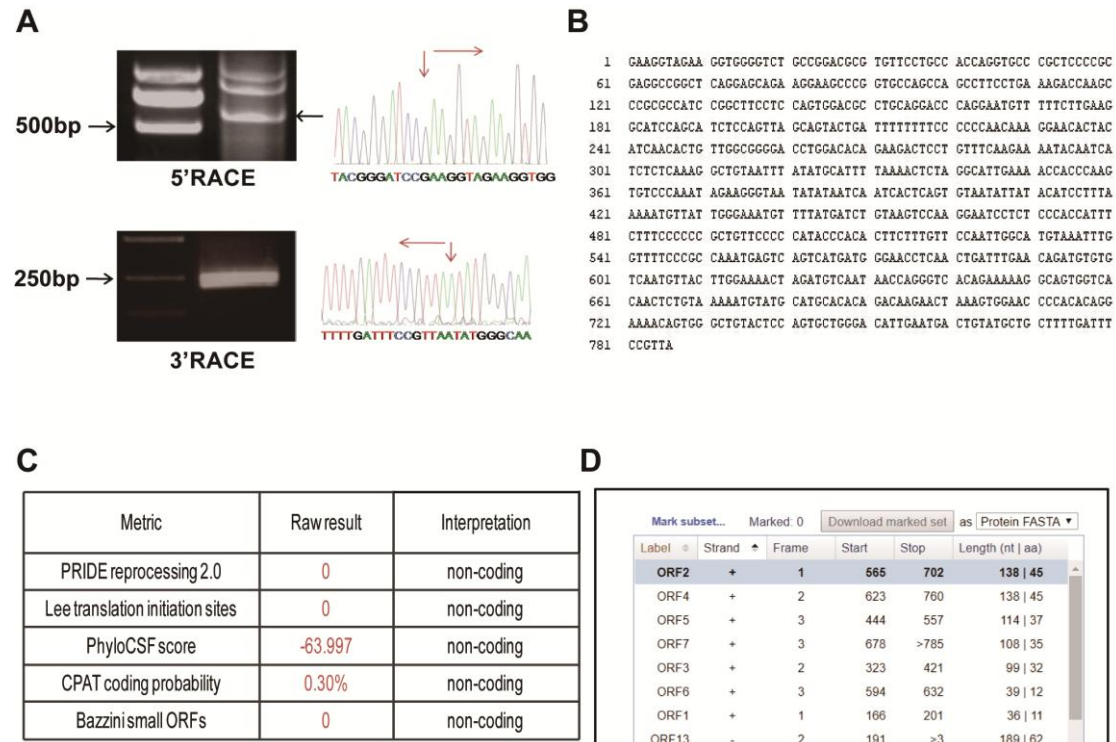

## Supplementary Fig. S2. Characterization of miR503HG as long non-coding RNA.

(A) Agarose gel electrophoresis of PCR products from the 5'-RACE and 3'-RACE procedure (left). The sequencing of PCR products reveals the boundary between the universal anchor primer and the miR503HG sequences (right). The red arrow indicates a putative transcriptional start and end site. (B) The nucleotide sequence of the full-length miR503HG. (C) The coding potential of miR503HG in several prediction software, and results showed that miR503HG didn't have any coding potential. (D) ORF Finder software prediction (the ORF finder, <https://www.ncbi.nlm.nih.gov/orffinder/>) for the protein-coding potential of miR503HG.



## Supplementary Fig. S3

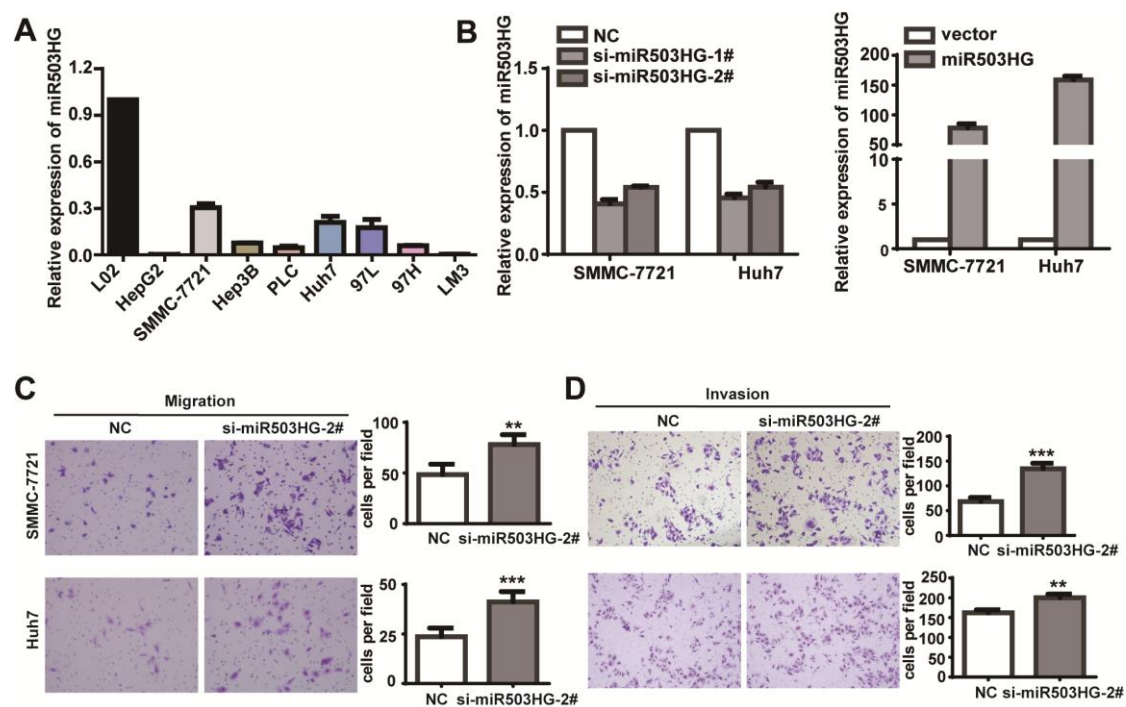

## Supplementary Fig. S3. The expression level of miR503HG in HCC cells

(A) Real-time PCR analysis of miR503HG expression in 8 HCC cell lines and normal liver cell L02. (B) Real-time PCR analysis of miR503HG expression in SMMC-7721 and Huh7 cells after transfection with two siRNAs against miR503HG (left). The expression levels of miR503HG in SMMC-7721 and Huh7 cells that had been stably transfected with lentivirus encoding miR503HG (right). (C) Migration assays of SMMC-7721 and Huh7 cells with miR503HG knockdown by using siRNA-2#. (D) Invasion assays of SMMC-7721 and Huh7 cells with miR503HG knockdown by using siRNA-2#. Error bars represent  $\pm$ SD. \*\* $P < 0.01$  and \*\*\* $P < 0.001$ .

**Supplementary Fig. S4**

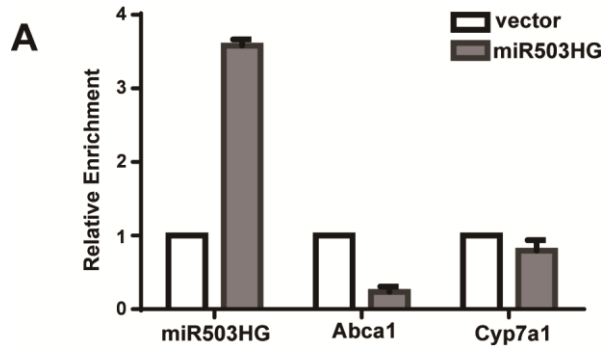

**Supplementary Fig.S4. The enrichment of Abca1 and Cyp7a1 mRNAs on HNRNPA2B1.**

(A) RIP assays analyzed the enrichment of Abca1 and Cyp7a1 mRNAs on HNRNPA2B1 with overexpression of miR503HG in SMMC-7721 cells.

**Supplementary Fig.S5**

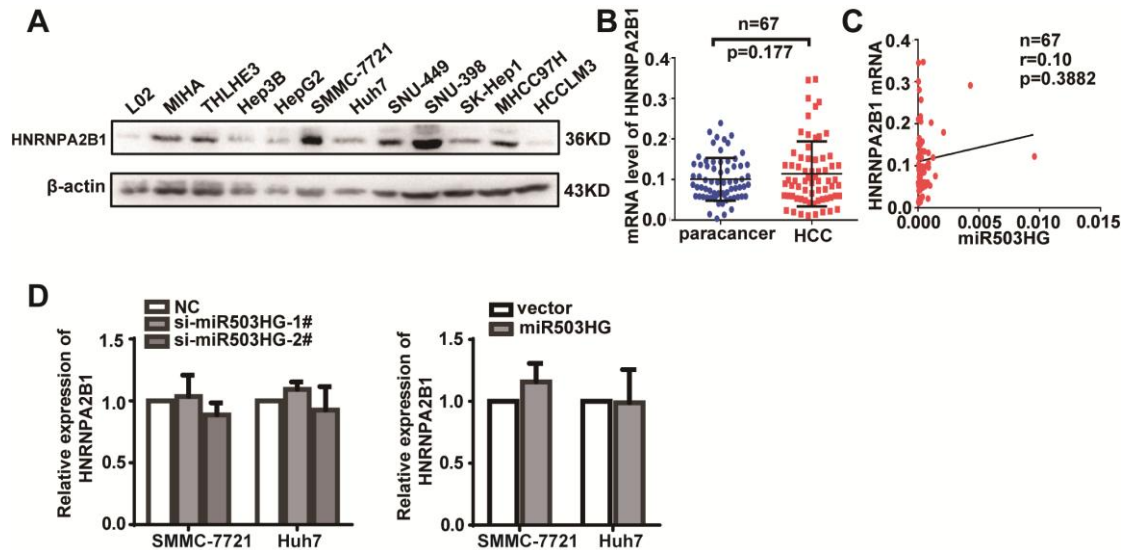

**Supplementary Fig.S5. miR503HG mediates ubiquitination and degradation of HNRNPA2B1 in HCC cells**

(A) Protein levels of HNRNPA2B1 in 11 HCC cell lines and normal liver cell L02. (B) mRNA levels of HNRNPA2B1 in 67 pairs of HCC samples. (C) Correlation analysis

showed the relationship between miR503HG (x) and HNRNPA2B1 (y) in 67 HCC tissues. (D) HNRNPA2B1 mRNA expression level in HCC cells with overexpression and knockdown of miR503HG.

### Supplementary Fig. S6

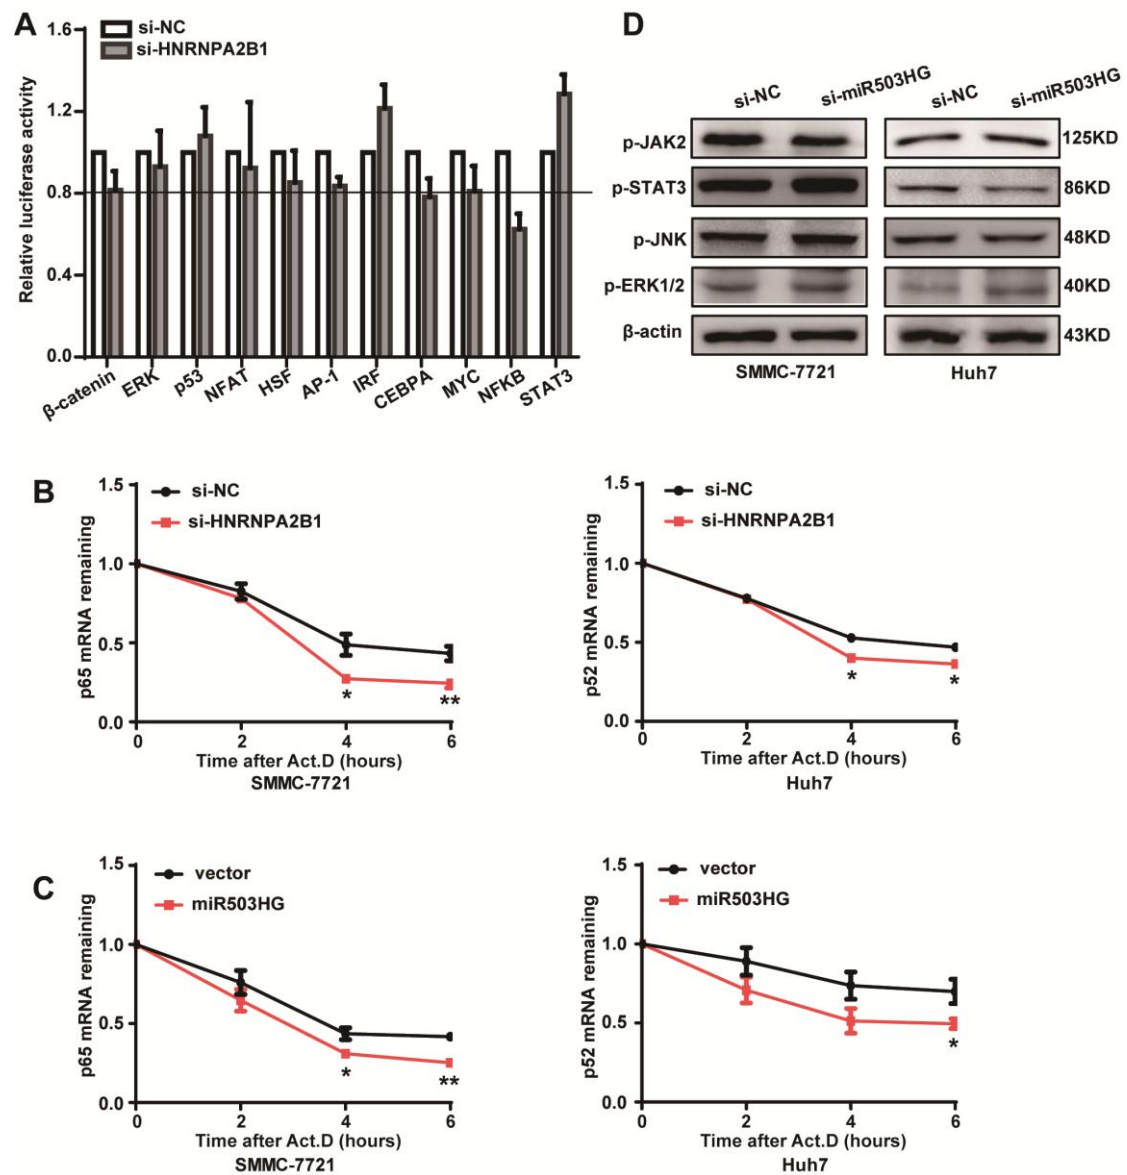

### Supplementary Fig.S6. miR503HG inhibits the NF-κB signaling pathway in HCC cells

(A) The luciferase activity of different signaling pathways in HNRNPA2B1 silenced

HCC cells. (B) mRNA decay of p52 and p65 were affected by knockdown of HNRNPA2B1. The remaining transcript of p52 and p65 was measured in SMMC-7721 and Huh7 cells after treatment of actinomycin D (Act.D). (C) mRNA decay of p52 and p65 were affected by overexpression of miR503HG in HCC cells. (D) The phosphorylation levels of JAK2, STAT3, JNK, ERK1/2 after miR503HG knockdown. Data in C and D are the means  $\pm$ SD. \*P<0.05 and \*\*P<0.01.

### Supplementary Fig.S7

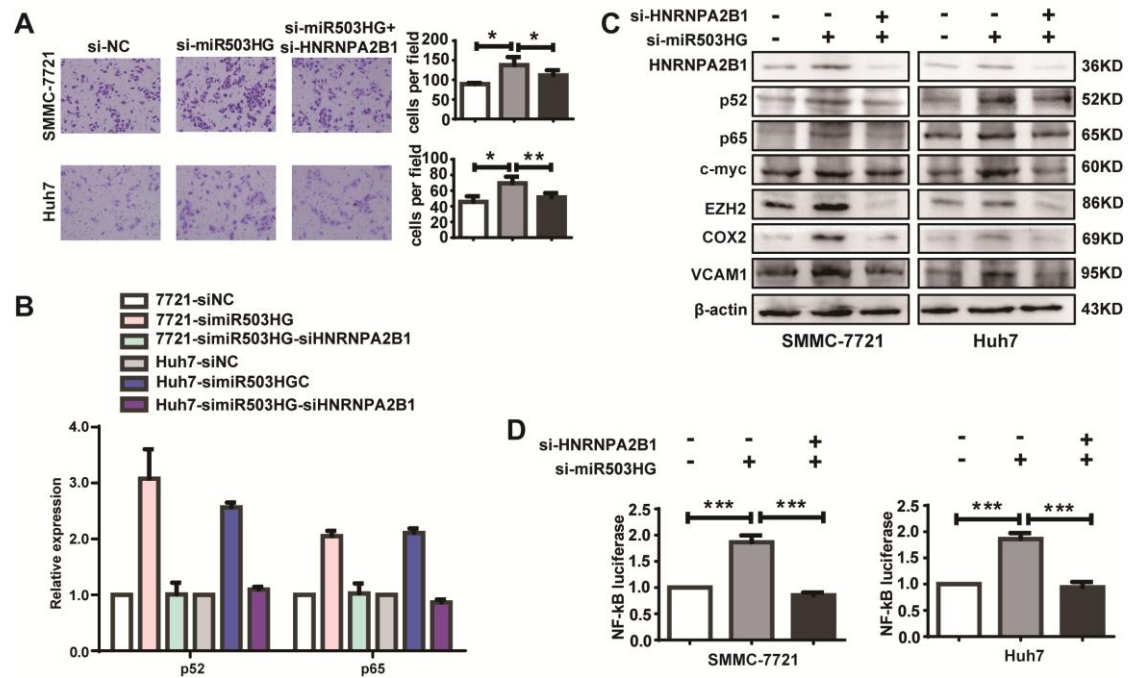

### Supplementary Fig.S7. HNRNPA2B1 is required for miR503HG regulation of HCC cell migration and the NF-κB signaling pathway

(A) Migration assay of SMMC-7721 and Huh7 cells with knockdown of miR503HG and HNRNPA2B1. (B) The mRNA levels of p52 and p65 in SMMC-7721 and Huh7 cells that concomitantly knockdown of miR503HG and HNRNPA2B1. (C) Western blot analysis shows the expression changes of p52, p65 and the NF-κB downstream

genes in HNRNPA2B1 silenced HCC cells. **(D)** Relative luciferase activity of NF- $\kappa$ B in SMMC-7721 and Huh7 cells with knockdown of miR503HG and HNRNPA2B1.

### Supplementary Fig.S8

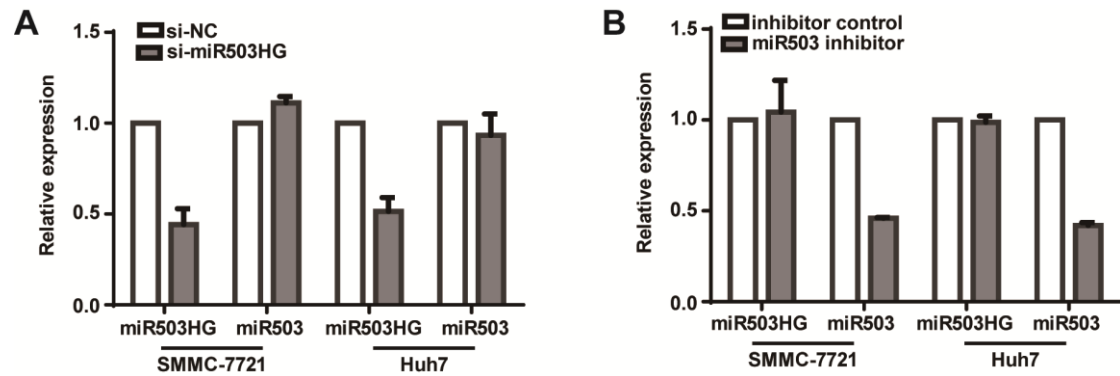

**Supplementary Fig.S8. miR503HG functions synergistically with miR503 to suppress HCC cell migration and invasion**

**(A)** Expression of miR503 and miR503HG following knockdown of miR503HG in SMMC-7721 and Huh7 cells. **(B)** Expression of miR503 and miR503HG following inhibition of miR503 in HCC cells.

### Supplementary Fig.S9

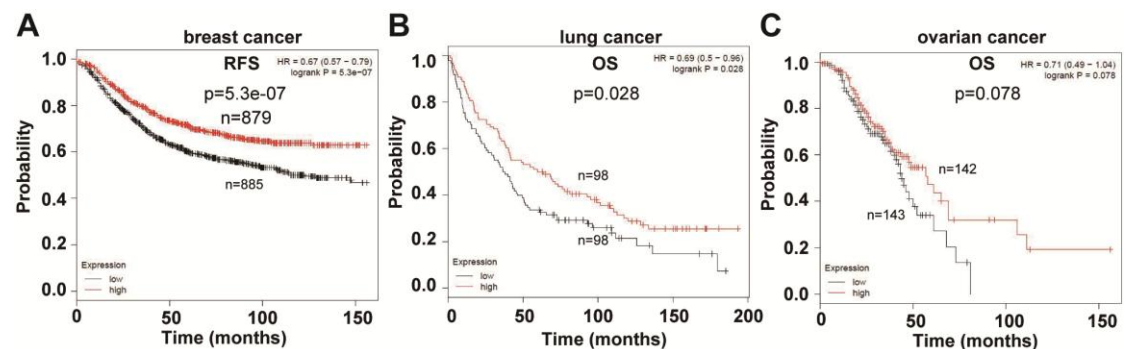

**Supplementary Fig. S9. The prognostic significance of miR503HG in public database.**

Online survival analysis software to assess the prognostic using microarray data of

miR503HG in breast cancer (**A**), lung cancer (**B**) and ovarian cancer (**C**).

**Supplementary Table S1. Clinicopathological characteristics of 93 HCC patients in miR503HG expression analysis**

| <b>Characteristics</b>           | <b>Case number</b> | <b>%</b> |
|----------------------------------|--------------------|----------|
| Sex                              |                    |          |
| Female                           | 16                 | 17.2     |
| Male                             | 77                 | 82.8     |
| Age (years)                      |                    |          |
| ≤50                              | 38                 | 40.9     |
| >50                              | 55                 | 59.1     |
| HBsAg                            |                    |          |
| Negative                         | 13                 | 16.7     |
| Positive                         | 65                 | 83.3     |
| Cirrhosis                        |                    |          |
| No                               | 15                 | 16.1     |
| Yes                              | 78                 | 83.9     |
| ALT(U/L)                         |                    |          |
| ≤75                              | 76                 | 89.4     |
| >75                              | 9                  | 10.6     |
| AFP(ng/mL)                       |                    |          |
| ≤20                              | 46                 | 54.1     |
| >20                              | 39                 | 45.9     |
| Tumor size (cm)                  |                    |          |
| ≤5                               | 50                 | 53.8     |
| >5                               | 43                 | 46.2     |
| Tumor number                     |                    |          |
| Single                           | 71                 | 76.3     |
| Multiple                         | 22                 | 23.7     |
| Tumor capsule                    |                    |          |
| None                             | 36                 | 39.6     |
| Complete                         | 55                 | 60.4     |
| Vascular invasion                |                    |          |
| No                               | 71                 | 76.3     |
| Yes                              | 22                 | 23.7     |
| Lymphatic and distant metastasis |                    |          |
| No                               | 73                 | 78.5     |
| Yes                              | 20                 | 21.5     |
| Tumor differentiation            |                    |          |
| I-II                             | 71                 | 78.0     |
| III-IV                           | 20                 | 22.0     |
| BCLC stage                       |                    |          |
| 0 and A                          | 15                 | 16.1     |
| B and C                          | 78                 | 83.9     |
| TNM stage                        |                    |          |
| I-II                             | 66                 | 71.0     |
| III-IV                           | 27                 | 29.0     |

Supplementary Table S2. Clinicopathological characteristics of 73 HCC patients in tissue microarray

| Characteristics       | Case number | %    |
|-----------------------|-------------|------|
| Sex                   |             |      |
| Female                | 11          | 15.1 |
| Male                  | 62          | 84.9 |
| Age (years)           |             |      |
| ≤50                   | 36          | 49.3 |
| >50                   | 37          | 50.7 |
| HBsAg                 |             |      |
| Negative              | 19          | 26.0 |
| Positive              | 54          | 74.0 |
| Tumor size (cm)       |             |      |
| ≤5                    | 27          | 36.9 |
| >5                    | 46          | 63.1 |
| Tumor number          |             |      |
| Single                | 56          | 76.7 |
| Multiple              | 17          | 23.3 |
| Vascular invasion     |             |      |
| No                    | 22          | 30.1 |
| Yes                   | 51          | 69.9 |
| Tumor differentiation |             |      |
| I-II                  | 56          | 76.7 |
| III-IV                | 17          | 23.3 |
| TNM stage             |             |      |
| I-II                  | 54          | 73.9 |
| III-IV                | 19          | 26.7 |



**Supplementary Table S3. Differentially expressed lncRNAs in 12 pairs of HCC tissues and corresponding noncancerous liver tissues**

| SEQ_ID     | Parametric<br>p-value | FDR       | Geometric mean of<br>intensities | up or down | Chromosome | Start     | End       | length | seqname              |
|------------|-----------------------|-----------|----------------------------------|------------|------------|-----------|-----------|--------|----------------------|
| ASLNC03712 | 0.0000002             | 0.0000395 | 4.88                             | up         | chr1       | 148097375 | 148099328 | 1953   | uc001esz             |
| ASLNC06741 | 0.0000008             | 0.0000816 | 4.91                             | up         | chr6       | 26389261  | 26393741  | 4480   | uc003nhl             |
| ASLNC04019 | 0.0000045             | 0.000254  | 2.32                             | up         | chr1       | 113300593 | 113313119 | 12526  | uc001edd             |
| ASLNC22124 | 0.0000005             | 0.000276  | 2.73                             | up         | chr17      | 45813597  | 45829849  | 16252  | BC002350             |
| ASLNC20083 | 0.0000073             | 0.000346  | 3.71                             | up         | chr6       | 26237200  | 26240339  | 3139   | AK125133             |
| AK025108   | 0.0000087             | 0.000386  | 4.02                             | up         | chr1       | 223749141 | 223750974 | 1833   | HMLincRNA128         |
| ASLNC00740 | 0.0000107             | 0.000443  | 3.63                             | up         | chr2       | 234438826 | 234441794 | 2968   | NR_024322            |
| ASLNC17803 | 0.0000129             | 0.000499  | 2.65                             | up         | chr1       | 153467686 | 153470052 | 2366   | AK056250             |
| ASLNC01922 | 0.0000133             | 0.000509  | 3.68                             | up         | chr17      | 73721915  | 73732378  | 10463  | NR_002219            |
| ASLNC00686 | 0.0000197             | 0.00066   | 2.73                             | up         | chr2       | 111903360 | 111969163 | 65803  | NR_024373            |
| ASLNC15421 | 0.0000215             | 0.000701  | 2.99                             | up         | chr1       | 149822205 | 149822675 | 470    | AF086205             |
| ASLNC06583 | 0.0000242             | 0.000758  | 2.39                             | up         | chr6       | 34320941  | 34321986  | 1045   | uc003oje             |
| ASLNC00525 | 0.000029              | 0.000844  | 2.43                             | up         | chr1       | 211096569 | 211098103 | 1534   | NR_027285            |
| AF519769   | 0.0000304             | 0.000861  | 3.72                             | up         | chr1       | 223749802 | 223907284 | 157482 | HMLincRNA128         |
| AB384549   | 0.0000318             | 0.000874  | 2.18                             | up         | chr5       | 5476026   | 5542440   | 66414  | chr5:5408092-5514014 |
| ASLNC03898 | 0.0000357             | 0.000938  | 2.13                             | up         | chr1       | 149936942 | 149937474 | 532    | uc001eyq             |
| ASLNC18287 | 0.0000435             | 0.00106   | 2.53                             | up         | chr6       | 52637181  | 52641910  | 4729   | AK091117             |
| ASLNC04687 | 0.0000436             | 0.00106   | 2.56                             | up         | chr2       | 111681829 | 111969134 | 287305 | uc002the             |
| ASLNC16894 | 0.0000553             | 0.00123   | 2.03                             | up         | chr2       | 111708775 | 111710938 | 2163   | AK023908             |
| ASLNC11688 | 0.0000574             | 0.00126   | 2.19                             | up         | chr17      | 75520737  | 75526872  | 6135   | uc002jxg             |
| ASLNC02773 | 0.0000622             | 0.00133   | 2.27                             | up         | chr1       | 172100017 | 172102809 | 2792   | HIV1915              |
| ASLNC24399 | 0.0000644             | 0.00135   | 2.48                             | up         | chr1       | 32426154  | 32434145  | 7991   | L15344               |
| ASLNC13494 | 0.0000662             | 0.00138   | 2.52                             | up         | chr1       | 222683621 | 222688175 | 4554   | AF130049             |

|            |           |         |      |    |       |           |           |       |              |
|------------|-----------|---------|------|----|-------|-----------|-----------|-------|--------------|
| ASLNC24512 | 0.0000774 | 0.00153 | 3.33 | up | chr16 | 22980588  | 22981054  | 466   | U52050       |
| ASLNC24250 | 0.0000846 | 0.00161 | 1.96 | up | chr1  | 148082688 | 148087215 | 4527  | BX648801     |
| ASLNC12314 | 0.0000854 | 0.00163 | 2.99 | up | chr19 | 63431881  | 63462971  | 31090 | uc010eun     |
| ASLNC22486 | 0.0000884 | 0.00167 | 2.11 | up | chr20 | 13643623  | 13662388  | 18765 | BC027981     |
| ASLNC10384 | 0.0001068 | 0.00193 | 2.67 | up | chr14 | 64475624  | 64479284  | 3660  | uc001xhy     |
| ASLNC07321 | 0.000108  | 0.00194 | 2.48 | up | chr7  | 156124883 | 156126018 | 1135  | uc003wmn     |
| ASLNC01155 | 0.000113  | 0.002   | 2.1  | up | chr7  | 156123822 | 156126109 | 2287  | NR_026865    |
| ASLNC19572 | 0.0001408 | 0.0023  | 2.33 | up | chr3  | 12423345  | 12425917  | 2572  | AK123253     |
| ASLNC09418 | 0.0001465 | 0.00236 | 2.96 | up | chr12 | 97432821  | 97434079  | 1258  | uc001tfg     |
| ASLNC21055 | 0.0001559 | 0.00246 | 2.33 | up | chr17 | 77844880  | 77846073  | 1193  | AK129602     |
| ASLNC20628 | 0.0001586 | 0.00249 | 2.14 | up | chr2  | 227382893 | 227386726 | 3833  | AK127274     |
| ASLNC11736 | 0.0001922 | 0.00279 | 2.37 | up | chr17 | 71110505  | 71125597  | 15092 | uc010dgi     |
| ASLNC03876 | 0.0002002 | 0.00287 | 3.04 | up | chr1  | 148097375 | 148099338 | 1963  | uc001eta     |
| ASLNC12203 | 0.0002247 | 0.0031  | 2.56 | up | chr19 | 53310514  | 53365372  | 54858 | uc002pib     |
| ASLNC06832 | 0.00024   | 0.00322 | 2.37 | up | chr7  | 148025339 | 148026789 | 1450  | uc003wex     |
| ASLNC19106 | 0.0002803 | 0.00357 | 2.2  | up | chr3  | 44508267  | 44511231  | 2964  | AK096537     |
| ASLNC02384 | 0.0002859 | 0.00363 | 2.13 | up | chr8  | 141602279 | 141604998 | 2719  | ASO2058      |
| ASLNC22143 | 0.0002941 | 0.00371 | 1.82 | up | chr17 | 36058299  | 36060354  | 2055  | BC005066     |
| ASLNC02955 | 0.000302  | 0.00377 | 2.81 | up | chr5  | 138637718 | 138671116 | 33398 | LIT1318      |
| ASLNC19042 | 0.0003183 | 0.00391 | 1.91 | up | chr1  | 19409475  | 19412794  | 3319  | AK096098     |
| X65230     | 0.0003214 | 0.00392 | 2.61 | up | chr19 | 2847957   | 2887556   | 39599 | HMLincRNA189 |
| ASLNC18240 | 0.000329  | 0.00398 | 2.64 | up | chr1  | 62685089  | 62686631  | 1542  | AK090749     |
| ASLNC01054 | 0.0003369 | 0.00404 | 2.35 | up | chr6  | 52637157  | 52641910  | 4753  | NR_024403    |
| ASLNC19168 | 0.0003526 | 0.00417 | 2.16 | up | chr22 | 40557164  | 40560615  | 3451  | AK096917     |
| ASLNC06771 | 0.0003618 | 0.00424 | 1.9  | up | chr6  | 33770034  | 33774412  | 4378  | uc003oez     |
| ASLNC22443 | 0.0003653 | 0.00426 | 1.88 | up | chr16 | 24985758  | 24987747  | 1989  | BC023651     |

|            |           |         |      |    |       |           |           |        |                          |
|------------|-----------|---------|------|----|-------|-----------|-----------|--------|--------------------------|
| ASLNC03725 | 0.0003857 | 0.00445 | 2.32 | up | chr1  | 141960583 | 142005271 | 44688  | uc001ejf                 |
| ASLNC12787 | 0.0003917 | 0.00448 | 2.13 | up | chr22 | 29695633  | 29699587  | 3954   | uc003ajf                 |
| ASLNC01516 | 0.0003984 | 0.00453 | 2.65 | up | chr12 | 119892023 | 119894478 | 2455   | NR_024345                |
| ASLNC12455 | 0.0004066 | 0.0046  | 2.08 | up | chr20 | 25552680  | 25606706  | 54026  | uc002wuz                 |
| ASLNC14032 | 0.0004096 | 0.00463 | 1.99 | up | chr19 | 50544967  | 50546412  | 1445   | CR613691                 |
| ASLNC17913 | 0.0004348 | 0.00483 | 2.06 | up | chr13 | 112390083 | 112392130 | 2047   | AK057085                 |
| ASLNC15607 | 0.0004397 | 0.00487 | 2.21 | up | chr7  | 33020670  | 33027489  | 6819   | AF090932                 |
| ASLNC04867 | 0.0004454 | 0.00492 | 2.21 | up | chr2  | 170314742 | 170316619 | 1877   | uc002ufj                 |
| ASLNC19439 | 0.0004495 | 0.00495 | 2.56 | up | chr17 | 76839271  | 76840890  | 1619   | AK098424                 |
| ASLNC20394 | 0.0004597 | 0.00504 | 1.83 | up | chr2  | 42411888  | 42414128  | 2240   | AK126362                 |
| ASLNC09376 | 0.0004696 | 0.00512 | 1.87 | up | chr12 | 119413205 | 119418111 | 4906   | uc001tyk                 |
| ASLNC20446 | 0.0004704 | 0.00512 | 2.01 | up | chr19 | 4399806   | 4401833   | 2027   | AK126579                 |
| ASLNC00172 | 0.0004831 | 0.00522 | 2.85 | up | chr5  | 138671552 | 138671812 | 260    | uc.174-                  |
| ASLNC15410 | 0.0004849 | 0.00523 | 1.98 | up | chr17 | 42371519  | 42372225  | 706    | AF086179                 |
| EC579926   | 0.0004892 | 0.00525 | 2.1  | up | chr5  | 114876225 | 114876280 | 55     | HMLincRNA764             |
| ASLNC12559 | 0.0005077 | 0.00537 | 2.56 | up | chr20 | 3815914   | 3817231   | 1317   | uc002wjz                 |
| ASLNC14901 | 0.0005136 | 0.00541 | 2.58 | up | chr17 | 59176346  | 59204638  | 28292  | AX810724                 |
| ASLNC14700 | 0.0005208 | 0.00546 | 2.04 | up | chr2  | 95554584  | 95556177  | 1593   | BC018776                 |
| ASLNC15705 | 0.0005347 | 0.00557 | 1.97 | up | chr8  | 126438653 | 126448544 | 9891   | AF147336                 |
| ASLNC10710 | 0.0005517 | 0.00568 | 2.17 | up | chr15 | 41219610  | 41220757  | 1147   | uc001zqs                 |
| BI549227   | 0.0005774 | 0.00586 | 2.15 | up | chr7  | 7646921   | 8066323   | 419402 | chr7:7895500-7963275     |
| ASLNC11492 | 0.0005862 | 0.00592 | 2.22 | up | chr17 | 24248975  | 24249914  | 939    | uc002hdf                 |
| ASLNC07076 | 0.0006457 | 0.00628 | 1.77 | up | chr7  | 65633737  | 65657259  | 23522  | uc010lad                 |
| BF856985   | 0.0006545 | 0.00632 | 1.95 | up | chr2  | 224425385 | 224425606 | 221    | chr2:224419425-224431400 |
| ASLNC07921 | 0.0006692 | 0.00641 | 3.01 | up | chr9  | 96357243  | 96370230  | 12987  | uc004aut                 |
| T35622     | 0.0006776 | 0.00646 | 2.06 | up | chrX  | 62434977  | 62435244  | 267    | chrX:62428575-62446375   |

|            |           |         |      |    |       |           |           |        |                         |
|------------|-----------|---------|------|----|-------|-----------|-----------|--------|-------------------------|
| ASLNC24021 | 0.0006834 | 0.00648 | 2.76 | up | chr17 | 26884318  | 26885064  | 746    | BC131530                |
| ASLNC20619 | 0.0006907 | 0.00653 | 1.84 | up | chr8  | 146003055 | 146023229 | 20174  | AK127225                |
| ASLNC05695 | 0.0006951 | 0.00656 | 1.93 | up | chr4  | 55924896  | 55944320  | 19424  | uc003hav                |
| ASLNC14537 | 0.0007558 | 0.00695 | 2.34 | up | chrX  | 70385038  | 70388330  | 3292   | AY927569                |
| ASLNC18342 | 0.0007564 | 0.00695 | 2.3  | up | chr10 | 96353371  | 96356258  | 2887   | AK091544                |
| H72664     | 0.0007912 | 0.00718 | 2.56 | up | chrX  | 45796347  | 45803116  | 6769   | chrX:45782500-45808725  |
| DB042414   | 0.0007928 | 0.00718 | 2.2  | up | chr1  | 172133219 | 172133782 | 563    | HMLincRNA111            |
| L13616     | 0.0008088 | 0.0073  | 2.08 | up | chr8  | 141738349 | 142080514 | 342165 | HMLincRNA565            |
| ASLNC01797 | 0.0008248 | 0.00742 | 2.25 | up | chr16 | 30838140  | 30842091  | 3951   | NR_024348               |
| ASLNC11574 | 0.0008447 | 0.00756 | 2.02 | up | chr17 | 77478995  | 77481667  | 2672   | uc002kco                |
| ASLNC16733 | 0.0008554 | 0.00764 | 2.07 | up | chr22 | 48668094  | 48671071  | 2977   | AK022892                |
| ASLNC04395 | 0.0008674 | 0.00771 | 2.29 | up | chr2  | 111903365 | 111904956 | 1591   | uc010fkf                |
| ASLNC21870 | 0.0008683 | 0.00771 | 2.55 | up | chr7  | 137830937 | 137919226 | 88289  | AL365456                |
| ASLNC13606 | 0.0008737 | 0.00775 | 1.78 | up | chr5  | 32472507  | 32472838  | 331    | BC063380                |
| AI700920   | 0.0008838 | 0.0078  | 1.94 | up | chr12 | 28593261  | 28624143  | 30882  | chr12:28607450-28619725 |
| ASLNC01821 | 0.0008871 | 0.00781 | 1.98 | up | chr17 | 26082849  | 26109477  | 26628  | NR_024187               |
| ASLNC21970 | 0.0008972 | 0.00788 | 2.66 | up | chr9  | 138626301 | 138631454 | 5153   | AY129027                |
| ASLNC01554 | 0.0009123 | 0.00798 | 2    | up | chr12 | 6863405   | 6864027   | 622    | NR_002803               |
| AK127561   | 0.0009139 | 0.00798 | 2.68 | up | chr1  | 223749804 | 223769722 | 19918  | HMLincRNA128            |
| ASLNC09859 | 0.0009412 | 0.00816 | 1.76 | up | chr13 | 43872387  | 43878021  | 5634   | uc001uzl                |
| ASLNC14380 | 0.0009711 | 0.00831 | 1.95 | up | chr17 | 78154153  | 78155343  | 1190   | AL136830                |
| ASLNC24004 | 0.0010305 | 0.0087  | 1.67 | up | chr17 | 23724829  | 23725144  | 315    | BC128525                |
| ASLNC13500 | 0.0011274 | 0.00927 | 2.07 | up | chr17 | 55117194  | 55118452  | 1258   | AF130062                |
| ASLNC24076 | 0.0011373 | 0.00934 | 2    | up | chr13 | 97849540  | 97857747  | 8207   | BX537667                |
| ASLNC18105 | 0.001145  | 0.00938 | 1.85 | up | chr18 | 53484764  | 53486784  | 2020   | AK058035                |
| ASLNC19929 | 0.0011755 | 0.00955 | 2.3  | up | chr22 | 40553522  | 40558112  | 4590   | AK124515                |

|            |           |         |      |    |       |           |           |        |                        |
|------------|-----------|---------|------|----|-------|-----------|-----------|--------|------------------------|
| ASLNC04817 | 0.0011765 | 0.00955 | 2.75 | up | chr2  | 242263829 | 242274900 | 11071  | uc002wca               |
| ASLNC22072 | 0.0011789 | 0.00957 | 2.08 | up | chr1  | 35973178  | 35973419  | 241    | AY605064               |
| ASLNC22169 | 0.0011898 | 0.00964 | 1.81 | up | chr5  | 37322294  | 37323307  | 1013   | BC007784               |
| ASLNC14481 | 0.0012162 | 0.00973 | 2.07 | up | chr15 | 65119965  | 65127637  | 7672   | AY203937               |
| ASLNC22820 | 0.0012224 | 0.00977 | 2.12 | up | chr8  | 145991278 | 145992960 | 1682   | BC036118               |
| ASLNC12530 | 0.0012273 | 0.00978 | 2.03 | up | chr20 | 42279535  | 42285744  | 6209   | uc002xlo               |
| ASLNC08043 | 0.001241  | 0.00985 | 2.3  | up | chr9  | 35648873  | 35665863  | 16990  | uc003zxl               |
| ASLNC21947 | 0.0012601 | 0.00994 | 2.26 | up | chr2  | 95554443  | 95556197  | 1754   | AY010112               |
| ASLNC23093 | 0.0012795 | 0.0101  | 1.79 | up | chr3  | 144202439 | 144202999 | 560    | BC040051               |
| ASLNC09933 | 0.0013097 | 0.0102  | 1.77 | up | chr13 | 97851670  | 97857747  | 6077   | uc001vnl               |
| ASLNC13454 | 0.0013534 | 0.0105  | 1.85 | up | chr19 | 43801713  | 43819431  | 17718  | AF119846               |
| ASLNC14438 | 0.0013636 | 0.0106  | 2.21 | up | chr8  | 103907771 | 103945539 | 37768  | AL832582               |
| ASLNC16027 | 0.0014001 | 0.0108  | 1.78 | up | chr12 | 97467684  | 97468084  | 400    | AJ293393               |
| ASLNC18301 | 0.0014205 | 0.0109  | 1.97 | up | chr17 | 35337508  | 35340056  | 2548   | AK091224               |
| ASLNC01989 | 0.0014756 | 0.0112  | 2.13 | up | chr19 | 38485602  | 38487802  | 2200   | NR_026887              |
| ASLNC02328 | 0.0014993 | 0.0113  | 1.94 | up | chr16 | 3289661   | 3291406   | 1745   | ASO1713                |
| ASLNC07945 | 0.001503  | 0.0113  | 1.98 | up | chr9  | 135880409 | 135883044 | 2635   | uc004ceu               |
| AA810459   | 0.0016359 | 0.0121  | 2.09 | up | chr1  | 27399100  | 27399320  | 220    | HMlincRNA1153          |
| ASLNC11489 | 0.0016496 | 0.0121  | 2.52 | up | chr17 | 67578778  | 67623752  | 44974  | uc002jiu               |
| ASLNC03708 | 0.0016616 | 0.0122  | 2.23 | up | chr1  | 153371887 | 153372755 | 868    | uc009wpd               |
| H79841     | 0.0016799 | 0.0123  | 2.56 | up | chrX  | 45796351  | 45803154  | 6803   | chrX:45782500-45808725 |
| ASLNC23059 | 0.001728  | 0.0126  | 1.82 | up | chr1  | 158261373 | 158263208 | 1835   | BC039426               |
| CR456823   | 0.0017297 | 0.0126  | 5.01 | up | chrX  | 49481769  | 49485199  | 3430   | HMlincRNA1588          |
| ASLNC17828 | 0.0018406 | 0.0132  | 2.11 | up | chr8  | 43101049  | 43105062  | 4013   | AK056481               |
| ASLNC10535 | 0.001891  | 0.0134  | 2.56 | up | chr15 | 61987486  | 62125574  | 138088 | uc002ams               |
| ASLNC00528 | 0.0018941 | 0.0135  | 2.1  | up | chr1  | 218506143 | 218507680 | 1537   | NR_001587              |

|            |           |        |      |    |       |           |           |       |                        |
|------------|-----------|--------|------|----|-------|-----------|-----------|-------|------------------------|
| ASLNC05852 | 0.0019897 | 0.014  | 1.85 | up | chr5  | 153809720 | 153812118 | 2398  | uc0031vl               |
| ASLNC20579 | 0.0020646 | 0.0144 | 2.06 | up | chr7  | 99649215  | 99653093  | 3878  | AK127069               |
| ASLNC02120 | 0.0020694 | 0.0145 | 2.07 | up | chr21 | 46473585  | 46496032  | 22447 | NR_002776              |
| ASLNC00996 | 0.0021084 | 0.0146 | 2    | up | chr6  | 58354117  | 58395683  | 41566 | NR_003660              |
| CB163005   | 0.0021174 | 0.0147 | 1.92 | up | chr1  | 172138110 | 172138620 | 510   | HMlincRNA111           |
| ASLNC13166 | 0.0021574 | 0.0149 | 2.16 | up | chrX  | 79813827  | 79816373  | 2546  | uc004edn               |
| ASLNC03647 | 0.0021668 | 0.0149 | 1.81 | up | chr1  | 116744749 | 116762726 | 17977 | uc009whc               |
| ASLNC20144 | 0.0021986 | 0.015  | 2.29 | up | chr2  | 216790012 | 216793158 | 3146  | AK125369               |
| AL579364   | 0.002201  | 0.015  | 1.76 | up | chr13 | 40855880  | 40856778  | 898   | HMlincRNA506           |
| ASLNC04982 | 0.0022041 | 0.0151 | 2.1  | up | chr3  | 195791087 | 195792276 | 1189  | uc003fug               |
| ASLNC08806 | 0.0022577 | 0.0153 | 1.87 | up | chr10 | 34438814  | 34439996  | 1182  | uc001ixf               |
| ASLNC01145 | 0.0024405 | 0.0162 | 2.12 | up | chr7  | 45729914  | 45775142  | 45228 | NR_024271              |
| ASLNC04704 | 0.0025169 | 0.0166 | 2.48 | up | chr2  | 242263831 | 242266202 | 2371  | uc002wcb               |
| BU682041   | 0.0025971 | 0.0169 | 2    | up | chrX  | 62434270  | 62434507  | 237   | chrX:62428575-62446375 |
| BT009824   | 0.0026024 | 0.0169 | 1.79 | up | chr6  | 26653413  | 26653684  | 271   | HMlincRNA372           |
| ASLNC02364 | 0.0027171 | 0.0175 | 1.97 | up | chr17 | 24248981  | 24249914  | 933   | ASO1973                |
| ASLNC03746 | 0.0028005 | 0.0179 | 2.21 | up | chr1  | 141746421 | 141832193 | 85772 | uc001ejd               |
| ASLNC13459 | 0.002837  | 0.018  | 2.05 | up | chr12 | 111429974 | 111430837 | 863   | AF119855               |
| ASLNC18153 | 0.0030276 | 0.0189 | 1.75 | up | chr8  | 96068284  | 96070570  | 2286  | AK074467               |
| ASLNC04593 | 0.0031694 | 0.0195 | 1.83 | up | chr2  | 3584012   | 3587197   | 3185  | uc002qXu               |
| ASLNC20127 | 0.0031833 | 0.0196 | 1.77 | up | chr7  | 5432441   | 5435084   | 2643  | AK125308               |
| ASLNC16715 | 0.0034323 | 0.0208 | 1.81 | up | chr1  | 10439963  | 10442209  | 2246  | AK022602               |
| DW407854   | 0.0035336 | 0.0213 | 2.47 | up | chr5  | 180610475 | 180610914 | 439   | HMlincRNA239           |
| ASLNC08553 | 0.0036066 | 0.0217 | 1.85 | up | chr10 | 81957445  | 81969392  | 11947 | uc001kbv               |
| ASLNC06183 | 0.0036279 | 0.0217 | 1.94 | up | chr5  | 157115457 | 157120295 | 4838  | uc003lxf               |
| ASLNC12125 | 0.0036482 | 0.0218 | 2.38 | up | chr19 | 41495808  | 41514450  | 18642 | uc002odt               |

|            |           |        |      |    |       |           |           |       |                          |
|------------|-----------|--------|------|----|-------|-----------|-----------|-------|--------------------------|
| BF327102   | 0.0036494 | 0.0218 | 1.91 | up | chr1  | 191493784 | 191494007 | 223   | chr1:191490425-191504575 |
| ASLNC21946 | 0.0036497 | 0.0218 | 1.94 | up | chr8  | 11697706  | 11733819  | 36113 | AY007159                 |
| ASLNC04509 | 0.0036777 | 0.0219 | 1.76 | up | chr2  | 110578524 | 110627280 | 48756 | uc002tft                 |
| ASLNC11193 | 0.0036782 | 0.0219 | 2.05 | up | chr16 | 88696195  | 88731900  | 35705 | uc002fqr                 |
| exon3717   | 0.0037519 | 0.0223 | 2.02 | up | chr7  | 25954785  | 25955047  | 262   | chr7:25945000-25956500   |
| ASLNC18707 | 0.0037717 | 0.0223 | 1.84 | up | chr20 | 56994136  | 56995891  | 1755  | AK094347                 |
| ASLNC01245 | 0.003795  | 0.0224 | 2.11 | up | chr8  | 135679495 | 135682114 | 2619  | NR_002438                |
| ASLNC12337 | 0.0039348 | 0.023  | 1.86 | up | chr20 | 48342663  | 48364863  | 22200 | uc002xvk                 |
| ASLNC11977 | 0.004027  | 0.0234 | 1.75 | up | chr19 | 53995049  | 54005985  | 10936 | uc010emj                 |
| ASLNC15627 | 0.0040591 | 0.0235 | 1.83 | up | chr2  | 96624476  | 96624897  | 421   | AF117338                 |
| ASLNC01726 | 0.0040729 | 0.0236 | 1.84 | up | chr15 | 66883213  | 66886494  | 3281  | NR_026808                |
| ASLNC20139 | 0.0040997 | 0.0237 | 1.74 | up | chr11 | 62098221  | 62101634  | 3413  | AK125351                 |
| ASLNC23502 | 0.0041532 | 0.0239 | 1.7  | up | chr19 | 63206069  | 63209588  | 3519  | BC044949                 |
| ASLNC03093 | 0.0044559 | 0.0252 | 1.83 | up | chr12 | 6863439   | 6864025   | 586   | LIT2101                  |
| ASLNC02135 | 0.0046717 | 0.026  | 1.83 | up | chr21 | 45532394  | 45541696  | 9302  | NR_026943                |
| ASLNC16210 | 0.0047112 | 0.0261 | 2.04 | up | chr2  | 111682070 | 111686182 | 4112  | AK001796                 |
| DB308427   | 0.0048027 | 0.0265 | 2.61 | up | chr19 | 35220541  | 35221068  | 527   | chr19:35205200-35223675  |
| CD671102   | 0.0049663 | 0.0273 | 1.85 | up | chr19 | 35220020  | 35220481  | 461   | chr19:35205200-35223675  |
| ASLNC10490 | 0.0049906 | 0.0274 | 1.67 | up | chr15 | 80938884  | 80979983  | 41099 | uc002bii                 |
| ASLNC10890 | 0.0050903 | 0.0278 | 2.04 | up | chr16 | 21382377  | 21439266  | 56889 | uc002dja                 |
| CD514437   | 0.0053894 | 0.0289 | 1.7  | up | chr2  | 224425408 | 224426120 | 712   | chr2:224419425-224431400 |
| L43964     | 0.0053899 | 0.0289 | 1.85 | up | chr1  | 225125582 | 225150420 | 24838 | HMLincRNA124             |
| ASLNC03240 | 0.0055111 | 0.0293 | 2.06 | up | chr1  | 6720      | 9622      | 2902  | uc001aai                 |
| ASLNC13627 | 0.0056568 | 0.0298 | 1.72 | up | chr12 | 119049455 | 119060589 | 11134 | BC080184                 |
| ASLNC14854 | 0.0057664 | 0.0302 | 2.12 | up | chr8  | 81562019  | 81574632  | 12613 | AX721121                 |
| ASLNC21307 | 0.0058075 | 0.0303 | 1.83 | up | chr7  | 72661527  | 72663768  | 2241  | AK130335                 |

|            |           |        |      |    |       |           |           |       |                          |
|------------|-----------|--------|------|----|-------|-----------|-----------|-------|--------------------------|
| ASLNC20031 | 0.0062708 | 0.0321 | 1.79 | up | chr20 | 39457481  | 39467547  | 10066 | AK124874                 |
| BM012363   | 0.0063788 | 0.0325 | 1.63 | up | chrX  | 62435948  | 62436164  | 216   | chrX:62428575-62446375   |
| ASLNC00597 | 0.0064153 | 0.0325 | 1.7  | up | chr1  | 116748858 | 116762728 | 13870 | NR_024125                |
| BE891694   | 0.0064172 | 0.0325 | 1.7  | up | chr5  | 180606185 | 180606718 | 533   | HMLincRNA239             |
| AK127627   | 0.0064863 | 0.0328 | 2.16 | up | chr18 | 10721473  | 10763583  | 42110 | HMLincRNA783             |
| ASLNC01405 | 0.0065041 | 0.0329 | 1.91 | up | chr10 | 27574787  | 27581241  | 6454  | NR_003525                |
| ASLNC19038 | 0.0067495 | 0.0337 | 1.86 | up | chr1  | 176960063 | 176962043 | 1980  | AK096082                 |
| ASLNC07038 | 0.0070307 | 0.0349 | 1.72 | up | chr7  | 100647704 | 100654191 | 6487  | uc003uyf                 |
| AI016153   | 0.0070737 | 0.035  | 2.24 | up | chr8  | 57124793  | 57125003  | 210   | HMLincRNA1074            |
| ASLNC04882 | 0.0071739 | 0.0355 | 1.9  | up | chr2  | 114067712 | 114070625 | 2913  | uc002tke                 |
| ASLNC03682 | 0.0072045 | 0.0356 | 1.69 | up | chr1  | 151882577 | 151885399 | 2822  | uc001fcp                 |
| ASLNC10703 | 0.0075039 | 0.0367 | 1.78 | up | chr15 | 27754485  | 27758659  | 4174  | uc001zcp                 |
| ASLNC01531 | 0.0075425 | 0.0367 | 1.87 | up | chr12 | 99081164  | 99091466  | 10302 | NR_024261                |
| ASLNC10972 | 0.0075591 | 0.0368 | 1.84 | up | chr16 | 23393725  | 23429309  | 35584 | uc010bxo                 |
| BG222385   | 0.0075792 | 0.0369 | 1.72 | up | chr1  | 159375599 | 159375980 | 381   | HMLincRNA121             |
| ASLNC17882 | 0.0076188 | 0.037  | 2.76 | up | chr9  | 84784324  | 84787171  | 2847  | AK056882                 |
| W20127     | 0.0076378 | 0.0371 | 1.9  | up | chr2  | 127031469 | 127032121 | 652   | chr2:127007450-127034900 |
| U90549     | 0.0077254 | 0.0374 | 1.95 | up | chr6  | 26652732  | 26654703  | 1971  | HMLincRNA372             |
| ASLNC15880 | 0.0078535 | 0.0378 | 1.75 | up | chr13 | 97905675  | 97914040  | 8365  | AF339785                 |
| ASLNC20130 | 0.0079215 | 0.0381 | 1.79 | up | chr6  | 3176635   | 3216068   | 39433 | AK125314                 |
| ASLNC20415 | 0.0079273 | 0.0381 | 1.86 | up | chr9  | 134553682 | 134556009 | 2327  | AK126436                 |
| ASLNC24207 | 0.0079349 | 0.0381 | 1.78 | up | chr19 | 45553588  | 45558327  | 4739  | BX648310                 |
| ASLNC15595 | 0.0079402 | 0.0381 | 1.86 | up | chr15 | 48786797  | 48828242  | 41445 | AF090911                 |
| ASLNC16402 | 0.0081631 | 0.039  | 1.66 | up | chr17 | 56818956  | 56820626  | 1670  | AK021817                 |
| ASLNC21792 | 0.0081646 | 0.039  | 1.7  | up | chr2  | 152051036 | 152062973 | 11937 | AL137363                 |
| ASLNC05554 | 0.0081992 | 0.039  | 1.8  | up | chr4  | 689572    | 718816    | 29244 | uc003gbc                 |



|            |           |        |      |    |       |           |           |        |                          |
|------------|-----------|--------|------|----|-------|-----------|-----------|--------|--------------------------|
| ASLNC06007 | 0.0084449 | 0.04   | 1.97 | up | chr5  | 126408949 | 126437071 | 28122  | uc003kug                 |
| ASLNC23199 | 0.0086115 | 0.0405 | 1.83 | up | chr17 | 37258298  | 37260848  | 2550   | BC040976                 |
| CR736777   | 0.0086191 | 0.0406 | 2.08 | up | chr2  | 127031291 | 127031786 | 495    | chr2:127007450-127034900 |
| ASLNC14843 | 0.0086337 | 0.0406 | 1.8  | up | chr6  | 43105778  | 43106773  | 995    | BC039515                 |
| ASLNC15956 | 0.0087566 | 0.0411 | 1.84 | up | chr16 | 23490680  | 23491100  | 420    | AJ001827                 |
| ASLNC08375 | 0.0087985 | 0.0412 | 1.77 | up | chr10 | 133631176 | 133633859 | 2683   | uc001lku                 |
| ASLNC20159 | 0.0088909 | 0.0415 | 2.1  | up | chr3  | 33407598  | 33409958  | 2360   | AK125415                 |
| ASLNC07067 | 0.0090677 | 0.0421 | 1.72 | up | chr7  | 104541702 | 104542701 | 999    | uc003vcr                 |
| BG334695   | 0.0091727 | 0.0425 | 1.86 | up | chrX  | 62435948  | 62436157  | 209    | chrX:62428575-62446375   |
| ASLNC18219 | 0.0091754 | 0.0425 | 1.77 | up | chr8  | 37835624  | 37837865  | 2241   | AK090578                 |
| ASLNC13431 | 0.0093261 | 0.043  | 1.75 | up | chr8  | 124095373 | 124096405 | 1032   | AF116708                 |
| ASLNC06258 | 0.0094729 | 0.0436 | 1.69 | up | chr5  | 43157398  | 43212103  | 54705  | uc003jnl                 |
| BG431977   | 0.0095193 | 0.0437 | 1.96 | up | chr5  | 180608194 | 180608936 | 742    | HMLincRNA239             |
| ASLNC23476 | 0.0095692 | 0.0438 | 1.8  | up | chr2  | 37355557  | 37358871  | 3314   | BC043642                 |
| ASLNC00653 | 0.0097633 | 0.0445 | 1.82 | up | chr2  | 110013297 | 110083422 | 70125  | NR_027145                |
| ASLNC13065 | 0.0099224 | 0.045  | 2.07 | up | chrX  | 151646635 | 151653828 | 7193   | uc004fgb                 |
| ASLNC24492 | 0.0099683 | 0.0451 | 1.89 | up | chr7  | 154386313 | 154391474 | 5161   | U23862                   |
| ASLNC02087 | 0.0099837 | 0.0451 | 1.57 | up | chr20 | 28225539  | 28247668  | 22129  | NR_003579                |
| CB854497   | 0.0100156 | 0.0453 | 1.74 | up | chr2  | 224420706 | 224421381 | 675    | chr2:224419425-224431400 |
| ASLNC16942 | 0.0103166 | 0.0462 | 1.85 | up | chr8  | 22553828  | 22555620  | 1792   | AK024169                 |
| CV312899   | 0.0104058 | 0.0465 | 2.21 | up | chr12 | 9170879   | 9171225   | 346    | chr12:9168650-9183575    |
| ASLNC14889 | 0.0104475 | 0.0466 | 2.03 | up | chr17 | 24248927  | 24249283  | 356    | AX795353                 |
| ASLNC19304 | 0.0105237 | 0.0469 | 1.7  | up | chr1  | 16660029  | 16667563  | 7534   | AK097742                 |
| ASLNC04233 | 0.010581  | 0.0471 | 1.56 | up | chr2  | 110051207 | 110099956 | 48749  | uc010fjr                 |
| AK225978   | 0.0107212 | 0.0476 | 1.8  | up | chr5  | 150612877 | 150985719 | 372842 | chr5:150980275-150993600 |
| ASLNC08290 | 0.0108497 | 0.048  | 1.73 | up | chr9  | 67925645  | 67944120  | 18475  | uc004aey                 |

|            |           |        |      |    |       |           |           |        |                          |
|------------|-----------|--------|------|----|-------|-----------|-----------|--------|--------------------------|
| ASLNC02665 | 0.0108514 | 0.048  | 2.38 | up | chr1  | 28705159  | 28708732  | 3573   | HIV1447                  |
| ASLNC01731 | 0.0109512 | 0.0482 | 2.05 | up | chr15 | 87722276  | 87742722  | 20446  | NR_015411                |
| ASLNC07073 | 0.0110315 | 0.0485 | 1.79 | up | chr7  | 30567606  | 30583900  | 16294  | uc003tbi                 |
| ASLNC09658 | 0.0112151 | 0.049  | 1.61 | up | chr12 | 56611573  | 56616114  | 4541   | uc001sqo                 |
| ASLNC03650 | 0.0112725 | 0.0491 | 1.55 | up | chr1  | 149519123 | 149521029 | 1906   | uc001exo                 |
| ASLNC20473 | 0.011305  | 0.0492 | 1.72 | up | chr10 | 75199027  | 75202626  | 3599   | AK126671                 |
| BF373573   | 0.0114363 | 0.0497 | 1.77 | up | chr2  | 224425451 | 224425652 | 201    | chr2:224419425-224431400 |
| DB445318   | 0.0114675 | 0.0498 | 1.95 | up | chr7  | 7646918   | 8010214   | 363296 | chr7:7895500-7963275     |
| ASLNC21672 | 0.011509  | 0.05   | 1.55 | up | chr10 | 32135224  | 32136649  | 1425   | AL050183                 |
| ASLNC19402 | 0.0115371 | 0.05   | 1.69 | up | chr17 | 39535270  | 39538229  | 2959   | AK098202                 |
| ASLNC04751 | 0.0115695 | 0.0501 | 1.69 | up | chr2  | 128317596 | 128319641 | 2045   | uc010fmc                 |
| ASLNC19006 | 0.0116169 | 0.0503 | 1.6  | up | chr9  | 139597061 | 139599296 | 2235   | AK095845                 |
| ASLNC12170 | 0.0116684 | 0.0504 | 1.85 | up | chr19 | 53433402  | 53450962  | 17560  | uc002pij                 |
| ASLNC11994 | 0.0117534 | 0.0506 | 2.08 | up | chr19 | 5845685   | 5855025   | 9340   | uc002mdr                 |
| ASLNC10528 | 0.0118073 | 0.0508 | 1.75 | up | chr15 | 82659729  | 82689892  | 30163  | uc002bkc                 |
| ASLNC17209 | 0.0123829 | 0.0526 | 1.7  | up | chr19 | 39570013  | 39571838  | 1825   | AK025210                 |
| AA090784   | 0.0124122 | 0.0527 | 1.98 | up | chr5  | 114876309 | 114876607 | 298    | HMLincRNA764             |
| ASLNC02679 | 0.0127406 | 0.0538 | 1.71 | up | chr20 | 39185449  | 39186522  | 1073   | HIV1528                  |
| ASLNC24264 | 0.0129198 | 0.0543 | 1.66 | up | chr9  | 124911598 | 124917218 | 5620   | BX648949                 |
| BG290174   | 0.0129668 | 0.0545 | 1.72 | up | chr5  | 44863295  | 44863977  | 682    | chr5:44862425-44872625   |
| ASLNC17535 | 0.0131418 | 0.0551 | 1.76 | up | chr17 | 50389119  | 50390786  | 1667   | AK054819                 |
| ASLNC04489 | 0.0131567 | 0.0551 | 1.71 | up | chr2  | 110595034 | 110647639 | 52605  | uc002tfv                 |
| ASLNC10573 | 0.0131754 | 0.0551 | 1.5  | up | chr15 | 82736015  | 82738221  | 2206   | uc002bke                 |
| ASLNC09118 | 0.0131822 | 0.0551 | 1.63 | up | chr11 | 62285590  | 62290757  | 5167   | uc009yoe                 |
| ASLNC21447 | 0.0132521 | 0.0553 | 1.86 | up | chr3  | 125141000 | 125142875 | 1875   | AK130630                 |
| ASLNC05947 | 0.0134212 | 0.0558 | 1.64 | up | chr5  | 67124796  | 67132641  | 7845   | uc003juz                 |

|            |           |        |      |    |       |           |           |        |                          |
|------------|-----------|--------|------|----|-------|-----------|-----------|--------|--------------------------|
| ASLNC01541 | 0.0135086 | 0.0561 | 1.67 | up | chr12 | 110761955 | 110765089 | 3134   | NR_015404                |
| AA723978   | 0.0136436 | 0.0565 | 1.69 | up | chr10 | 75056040  | 75056328  | 288    | HMlincRNA460             |
| AA584732   | 0.0137848 | 0.0569 | 1.62 | up | chr1  | 142369409 | 142369832 | 423    | chr1:142366925-142378900 |
| DA642269   | 0.0138847 | 0.0572 | 1.9  | up | chr1  | 172137815 | 172138397 | 582    | HMlincRNA111             |
| ASLNC01500 | 0.0139262 | 0.0573 | 1.88 | up | chr11 | 33054271  | 33057575  | 3304   | NR_015451                |
| ASLNC01233 | 0.0141126 | 0.0578 | 1.69 | up | chr8  | 94821514  | 94822223  | 709    | NR_027259                |
| ASLNC01941 | 0.0142227 | 0.0581 | 1.65 | up | chr18 | 5226723   | 5228028   | 1305   | NR_026849                |
| ASLNC11682 | 0.0145016 | 0.0589 | 1.71 | up | chr17 | 63640936  | 63643663  | 2727   | uc002jgq                 |
| ASLNC01384 | 0.0145932 | 0.059  | 1.75 | up | chr10 | 1058576   | 1080141   | 21565  | NR_024628                |
| ASLNC18310 | 0.0146171 | 0.0591 | 1.72 | up | chr1  | 11971064  | 11974240  | 3176   | AK091277                 |
| ASLNC08674 | 0.0146978 | 0.0592 | 1.85 | up | chr10 | 120890414 | 120915194 | 24780  | uc001lea                 |
| AK294833   | 0.0147557 | 0.0594 | 1.66 | up | chr18 | 30812261  | 30974615  | 162354 | chr18:30822250-30849925  |
| ASLNC14433 | 0.0147722 | 0.0594 | 1.71 | up | chr9  | 138737483 | 138738984 | 1501   | AL832531                 |
| ASLNC03813 | 0.0148435 | 0.0596 | 1.75 | up | chr1  | 153863170 | 153884959 | 21789  | uc001flf                 |
| BX448694   | 0.0152824 | 0.0609 | 1.98 | up | chr1  | 27399152  | 27399424  | 272    | HMlincRNA1153            |
| AF289584   | 0.0154234 | 0.0613 | 2.72 | up | chr16 | 48926548  | 49225628  | 299080 | chr16:49113275-49131950  |
| ASLNC05169 | 0.0155165 | 0.0615 | 1.59 | up | chr3  | 130589506 | 130592127 | 2621   | uc003emc                 |
| ASLNC13672 | 0.0156263 | 0.0618 | 1.64 | up | chr6  | 91280020  | 91284180  | 4160   | BX648277                 |
| ASLNC15760 | 0.0156365 | 0.0618 | 1.85 | up | chr2  | 24152164  | 24152683  | 519    | AF147425                 |
| ASLNC07346 | 0.015864  | 0.0624 | 1.83 | up | chr7  | 44005125  | 44025294  | 20169  | uc003tje                 |
| ASLNC14879 | 0.0162409 | 0.0635 | 1.65 | up | chr10 | 34689054  | 34706966  | 17912  | AX765710                 |
| ASLNC15179 | 0.0168733 | 0.0652 | 1.71 | up | chr11 | 76171270  | 76171896  | 626    | AF074986                 |
| BQ226790   | 0.016896  | 0.0652 | 1.74 | up | chr11 | 74014197  | 74057829  | 43632  | HMlincRNA1402            |
| ASLNC00615 | 0.0169588 | 0.0653 | 2.02 | up | chr1  | 47670392  | 47672900  | 2508   | NR_026878                |
| EG328602   | 0.0175178 | 0.0667 | 1.92 | up | chr12 | 9170930   | 9171457   | 527    | chr12:9168650-9183575    |
| CN346112   | 0.0178917 | 0.0679 | 1.66 | up | chr15 | 46804626  | 46805301  | 675    | chr15:46800350-46810550  |

|            |           |        |      |    |              |           |           |        |                        |
|------------|-----------|--------|------|----|--------------|-----------|-----------|--------|------------------------|
| R09394     | 0.0179095 | 0.0679 | 2.35 | up | chrX         | 62434803  | 62435106  | 303    | chrX:62428575-62446375 |
| AI863265   | 0.0180805 | 0.0682 | 1.83 | up | chr1         | 47684457  | 47684947  | 490    | HMlincRNA1126          |
| ASLNC03697 | 0.0182146 | 0.0685 | 1.96 | up | chr1         | 153284316 | 153290265 | 5949   | uc001fgo               |
| ASLNC22112 | 0.0182492 | 0.0686 | 1.94 | up | chr10        | 101938113 | 101979284 | 41171  | AY952888               |
| ASLNC00630 | 0.0184278 | 0.0691 | 2.05 | up | chr1         | 28705082  | 28708733  | 3651   | NR_002909              |
| ASLNC18074 | 0.0185002 | 0.0693 | 1.77 | up | chr5         | 133765672 | 133775471 | 9799   | AK057925               |
| BQ333288   | 0.0196663 | 0.0726 | 1.95 | up | chr13        | 40856529  | 40856755  | 226    | HMlincRNA506           |
| ASLNC02676 | 0.020296  | 0.0746 | 1.52 | up | chr5_h2_hap1 | 633471    | 633839    | 368    | HIV1505                |
| ASLNC18862 | 0.0203094 | 0.0746 | 1.62 | up | chr3         | 53868059  | 53870643  | 2584   | AK095091               |
| ASLNC11484 | 0.0206416 | 0.0753 | 1.66 | up | chr17        | 43331150  | 43350937  | 19787  | uc002imm               |
| ASLNC03460 | 0.0207064 | 0.0753 | 1.74 | up | chr1         | 245005937 | 245022308 | 16371  | uc001ibs               |
| DA418630   | 0.0208999 | 0.0758 | 1.72 | up | chr1         | 89871286  | 90171397  | 300111 | HMlincRNA1212          |
| AW140084   | 0.0209287 | 0.0758 | 1.82 | up | chr4         | 185634988 | 185635452 | 464    | HMlincRNA1448          |
| ASLNC19501 | 0.0209968 | 0.076  | 1.98 | up | chr7         | 138381187 | 138382614 | 1427   | AK098800               |
| ASLNC14036 | 0.0212657 | 0.0766 | 1.6  | up | chr1         | 24737878  | 24755102  | 17224  | CR613961               |
| ASLNC19906 | 0.0215376 | 0.0774 | 1.62 | up | chr3         | 12600273  | 12602296  | 2023   | AK124449               |
| DB280069   | 0.0226468 | 0.0804 | 1.6  | up | chr20        | 1540216   | 1626427   | 86211  | chr20:1594825-1615675  |
| ASLNC15182 | 0.0227767 | 0.0808 | 1.48 | up | chr3         | 50600969  | 50601480  | 511    | AF074992               |
| CB047103   | 0.0228804 | 0.0811 | 1.85 | up | chr1         | 172138039 | 172138668 | 629    | HMlincRNA111           |
| ASLNC19589 | 0.0229089 | 0.0812 | 1.61 | up | chr10        | 42331620  | 42334041  | 2421   | AK123297               |
| ASLNC09081 | 0.0230442 | 0.0815 | 1.62 | up | chr11        | 46359878  | 46361951  | 2073   | uc001ncr               |
| ASLNC12996 | 0.023362  | 0.0821 | 1.98 | up | chr22        | 23157818  | 23158694  | 876    | uc010gun               |
| BF434328   | 0.0234471 | 0.0822 | 1.8  | up | chr10        | 123677865 | 123701060 | 23195  | HMlincRNA1420          |
| ASLNC18698 | 0.0239772 | 0.0834 | 1.71 | up | chr4         | 990075    | 992136    | 2061   | AK094314               |
| ASLNC00968 | 0.0239962 | 0.0834 | 1.61 | up | chr6         | 2933199   | 2936403   | 3204   | NR_026855              |
| ASLNC14903 | 0.0242507 | 0.0841 | 1.58 | up | chr5         | 115194157 | 115194950 | 793    | AB002439               |

|            |           |        |      |    |       |           |           |        |                          |
|------------|-----------|--------|------|----|-------|-----------|-----------|--------|--------------------------|
| ASLNC08309 | 0.0243177 | 0.0843 | 1.79 | up | chr9  | 68659885  | 68664815  | 4930   | uc010mnv                 |
| ASLNC19055 | 0.0243366 | 0.0843 | 1.81 | up | chr8  | 141599437 | 141601721 | 2284   | AK096164                 |
| ASLNC07271 | 0.0244352 | 0.0845 | 1.51 | up | chr7  | 44588548  | 44589795  | 1247   | uc003tll                 |
| ASLNC05081 | 0.0246785 | 0.0853 | 1.89 | up | chr3  | 14959297  | 14960929  | 1632   | uc003bze                 |
| ASLNC16522 | 0.024731  | 0.0853 | 1.56 | up | chr6  | 88149335  | 88152306  | 2971   | AK022079                 |
| ASLNC15986 | 0.0247889 | 0.0854 | 1.64 | up | chr11 | 227040    | 242981    | 15941  | AJ012504                 |
| ASLNC01678 | 0.0247934 | 0.0854 | 1.68 | up | chr15 | 39363492  | 39379086  | 15594  | NR_026757                |
| ASLNC15663 | 0.0252547 | 0.0864 | 1.82 | up | chr6  | 7485688   | 7486557   | 869    | AF143325                 |
| ASLNC07308 | 0.0259395 | 0.0882 | 1.77 | up | chr7  | 55808365  | 55808868  | 503    | uc003tqy                 |
| ASLNC19257 | 0.0259836 | 0.0884 | 1.54 | up | chr7  | 128382385 | 128384345 | 1960   | AK097374                 |
| ASLNC16735 | 0.0263266 | 0.0892 | 1.57 | up | chr20 | 340551    | 342561    | 2010   | AK022947                 |
| ASLNC16798 | 0.0263398 | 0.0892 | 1.61 | up | chr12 | 123829632 | 123832395 | 2763   | AK023485                 |
| ASLNC21995 | 0.0263422 | 0.0892 | 1.7  | up | chr6  | 144212978 | 144220604 | 7626   | AY326463                 |
| AA376978   | 0.0270018 | 0.0908 | 1.7  | up | chr1  | 172138117 | 172138390 | 273    | HMLincRNA111             |
| ASLNC23971 | 0.027054  | 0.0909 | 1.54 | up | chr19 | 45429454  | 45429820  | 366    | BC127856                 |
| ASLNC02367 | 0.0271896 | 0.0913 | 1.73 | up | chr17 | 24249078  | 24249797  | 719    | ASO1977                  |
| ASLNC11943 | 0.0272719 | 0.0915 | 1.52 | up | chr19 | 42364321  | 42366760  | 2439   | uc002ofp                 |
| ASLNC16414 | 0.0272927 | 0.0915 | 1.72 | up | chr6  | 90598864  | 90600520  | 1656   | AK021848                 |
| ASLNC11197 | 0.0273741 | 0.0916 | 1.84 | up | chr16 | 88746682  | 88754873  | 8191   | uc010cji                 |
| ASLNC13527 | 0.027431  | 0.0917 | 1.96 | up | chr14 | 88692289  | 88694766  | 2477   | AF138861                 |
| CF126280   | 0.0275041 | 0.0919 | 1.85 | up | chr5  | 180606146 | 180616851 | 10705  | HMLincRNA239             |
| DB447077   | 0.0276603 | 0.0922 | 1.62 | up | chr7  | 7646939   | 8028666   | 381727 | chr7:7895500-7963275     |
| ASLNC00510 | 0.0276984 | 0.0923 | 1.62 | up | chr1  | 22224293  | 22230302  | 6009   | NR_023918                |
| CD358392   | 0.0278104 | 0.0925 | 1.66 | up | chr2  | 127031468 | 127032311 | 843    | chr2:127007450-127034900 |
| ASLNC07902 | 0.0278745 | 0.0926 | 1.57 | up | chr9  | 68116304  | 68138190  | 21886  | uc004aez                 |
| ASLNC19477 | 0.0279034 | 0.0927 | 1.53 | up | chr2  | 96844694  | 96846030  | 1336   | AK098629                 |

|            |           |        |      |    |       |           |           |        |                        |
|------------|-----------|--------|------|----|-------|-----------|-----------|--------|------------------------|
| AF015042   | 0.0279792 | 0.0929 | 1.53 | up | chr7  | 99709511  | 100000593 | 291082 | chr7:99948500-99966925 |
| ASLNC04983 | 0.0281836 | 0.0934 | 1.52 | up | chr3  | 198855914 | 198857282 | 1368   | uc010iaq               |
| ASLNC14534 | 0.0287229 | 0.0948 | 1.69 | up | chrX  | 106106500 | 106123233 | 16733  | AY927564               |
| ASLNC17699 | 0.0288318 | 0.095  | 1.62 | up | chr4  | 763994    | 765636    | 1642   | AK055583               |
| ASLNC17218 | 0.0300799 | 0.0978 | 1.62 | up | chr1  | 90096389  | 90098903  | 2514   | AK025238               |
| ASLNC22208 | 0.0301056 | 0.0979 | 1.57 | up | chr7  | 137923421 | 137924644 | 1223   | BC009590               |
| ASLNC06232 | 0.0308361 | 0.0996 | 1.71 | up | chr5  | 80569139  | 80633134  | 63995  | uc003khf               |
| ASLNC18765 | 0.031427  | 0.101  | 2.01 | up | chr10 | 79468319  | 79470465  | 2146   | AK094613               |
| ASLNC07342 | 0.0316537 | 0.102  | 1.5  | up | chr7  | 43614621  | 43735608  | 120987 | uc003tii               |
| ASLNC04795 | 0.0317355 | 0.102  | 1.63 | up | chr2  | 169336709 | 169351182 | 14473  | uc002ued               |
| ASLNC18734 | 0.0320842 | 0.102  | 1.75 | up | chr22 | 49396855  | 49399268  | 2413   | AK094442               |
| ASLNC13132 | 0.032087  | 0.102  | 1.62 | up | chrX  | 118417050 | 118470134 | 53084  | uc004erc               |
| ASLNC19485 | 0.0326335 | 0.104  | 1.64 | up | chr20 | 33040438  | 33042462  | 2024   | AK098707               |
| ASLNC12737 | 0.0345987 | 0.108  | 1.5  | up | chr21 | 46480565  | 46496171  | 15606  | uc002zis               |
| ASLNC07420 | 0.0358935 | 0.111  | 1.65 | up | chr7  | 27622117  | 27633634  | 11517  | uc003szj               |
| ASLNC24309 | 0.0366223 | 0.112  | 1.59 | up | chr21 | 33865926  | 33866181  | 255    | DQ102771               |
| ASLNC13866 | 0.037132  | 0.113  | 1.59 | up | chr3  | 130061248 | 130062059 | 811    | CR602639               |
| H09878     | 0.0374259 | 0.114  | 1.56 | up | chr14 | 34968948  | 34969309  | 361    | HMLincRNA320           |
| ASLNC05889 | 0.0395321 | 0.118  | 1.59 | up | chr5  | 179166929 | 179173204 | 6275   | uc003mkt               |
| ASLNC11541 | 0.0398787 | 0.119  | 1.51 | up | chr17 | 76554633  | 76559608  | 4975   | uc002jyv               |
| ASLNC01364 | 0.0401622 | 0.12   | 1.51 | up | chr10 | 64894994  | 64896326  | 1332   | NR_027182              |
| ASLNC03300 | 0.0407837 | 0.121  | 1.55 | up | chr1  | 3806830   | 3823649   | 16819  | uc001alg               |
| ASLNC14276 | 0.0424285 | 0.124  | 1.62 | up | chr19 | 51914607  | 51941503  | 26896  | CR749727               |
| ASLNC17589 | 0.0447187 | 0.128  | 1.54 | up | chr1  | 184672627 | 184674945 | 2318   | AK055021               |
| ASLNC16320 | 0.0447865 | 0.128  | 1.54 | up | chr20 | 31669416  | 31670899  | 1483   | AK021595               |
| ASLNC10599 | 0.0454602 | 0.13   | 1.53 | up | chr15 | 87705813  | 87740701  | 34888  | uc002bnt               |

|            |           |           |      |      |       |           |           |        |              |
|------------|-----------|-----------|------|------|-------|-----------|-----------|--------|--------------|
| ASLNC20311 | 0.0469317 | 0.133     | 1.58 | up   | chr4  | 7083181   | 7098859   | 15678  | AK126065     |
| ASLNC02348 | 0.0469779 | 0.133     | 1.5  | up   | chr2  | 27411912  | 27414172  | 2260   | ASO1856      |
| ASLNC07069 | 0.0474091 | 0.134     | 1.57 | up   | chr7  | 66295181  | 66404841  | 109660 | uc003tvo     |
| ASLNC12248 | 0.0483849 | 0.136     | 1.48 | up   | chr19 | 50909484  | 50912479  | 2995   | uc002pda     |
| ASLNC15310 | < 1e-07   | < 1e-07   | 7.56 | up   | chrX  | 132859135 | 132859615 | 480    | AF085935     |
| ASLNC02657 | 0.0000002 | 0.0000395 | 0.19 | down | chr2  | 88941511  | 89315056  | 373545 | HIV1411      |
| ASLNC04430 | 0.0000005 | 0.00006   | 0.18 | down | chr2  | 87419379  | 87419662  | 283    | uc010fgx     |
| ASLNC18858 | 0.0000007 | 0.0000763 | 0.23 | down | chr21 | 34813585  | 34815693  | 2108   | AK095069     |
| ASLNC13402 | 0.0000013 | 0.000112  | 0.2  | down | chr4  | 69732804  | 69733878  | 1074   | AF116651     |
| ASLNC24229 | 0.0000019 | 0.000143  | 0.24 | down | chr16 | 80685430  | 80689639  | 4209   | BX648557     |
| ASLNC15897 | 0.0000024 | 0.000174  | 0.24 | down | chr13 | 96730804  | 96732305  | 1501   | AF339810     |
| ASLNC16322 | 0.0000024 | 0.000174  | 0.28 | down | chr4  | 174695040 | 174697195 | 2155   | AK021601     |
| ASLNC06865 | 0.000005  | 0.000276  | 0.34 | down | chr7  | 142204178 | 142210546 | 6368   | uc003wbf     |
| ASLNC19504 | 0.0000055 | 0.000296  | 0.38 | down | chr2  | 144935148 | 144938115 | 2967   | AK098835     |
| ASLNC01768 | 0.0000057 | 0.000304  | 0.37 | down | chr16 | 55267149  | 55269154  | 2005   | NR_003669    |
| ASLNC07195 | 0.0000071 | 0.000342  | 0.25 | down | chr7  | 100557104 | 100557915 | 811    | uc003uxs     |
| ASLNC07210 | 0.0000095 | 0.00041   | 0.28 | down | chr7  | 78921243  | 78930237  | 8994   | uc010lea     |
| ASLNC21940 | 0.0000098 | 0.000415  | 0.27 | down | chr21 | 34810661  | 34815695  | 5034   | AY007090     |
| ASLNC05485 | 0.0000104 | 0.000435  | 0.3  | down | chr4  | 185523334 | 185528018 | 4684   | uc003iwe     |
| ASLNC09254 | 0.0000123 | 0.000482  | 0.36 | down | chr11 | 1712635   | 1728386   | 15751  | uc001lub     |
| ASLNC04893 | 0.0000124 | 0.000484  | 0.27 | down | chr2  | 88937790  | 88941389  | 3599   | uc002sti     |
| ASLNC24588 | 0.0000133 | 0.000509  | 0.37 | down | chr7  | 33938954  | 33940654  | 1700   | U85992       |
| ASLNC02800 | 0.0000135 | 0.00051   | 0.44 | down | chr7  | 142015814 | 142199560 | 183746 | HIV2426      |
| AY168789   | 0.0000196 | 0.00066   | 0.25 | down | chr5  | 95213947  | 95221590  | 7643   | HMLincRNA417 |
| ASLNC22454 | 0.0000205 | 0.000674  | 0.36 | down | chr11 | 43921167  | 43921924  | 757    | BC024745     |
| ASLNC06958 | 0.0000206 | 0.000674  | 0.41 | down | chr7  | 142194808 | 142210546 | 15738  | uc010loq     |

|            |           |          |      |      |       |           |           |        |                          |
|------------|-----------|----------|------|------|-------|-----------|-----------|--------|--------------------------|
| ASLNC16333 | 0.0000219 | 0.000709 | 0.34 | down | chr5  | 38526474  | 38527954  | 1480   | AK021628                 |
| ASLNC11164 | 0.0000227 | 0.000725 | 0.27 | down | chr16 | 55235099  | 55236224  | 1125   | uc010cci                 |
| ASLNC21985 | 0.0000235 | 0.000743 | 0.36 | down | chr21 | 39101903  | 39104979  | 3076   | AY216265                 |
| ASLNC02719 | 0.0000246 | 0.000763 | 0.26 | down | chr15 | 19974283  | 19974577  | 294    | HIV1707                  |
| Y00062     | 0.000026  | 0.000793 | 0.44 | down | chr1  | 196551575 | 196992953 | 441378 | chr1:196813275-196869300 |
| ASLNC19342 | 0.0000267 | 0.000807 | 0.5  | down | chr19 | 4865682   | 4867832   | 2150   | AK097879                 |
| ASLNC19643 | 0.0000287 | 0.00084  | 0.49 | down | chr2  | 191533493 | 191535668 | 2175   | AK123493                 |
| ASLNC07731 | 0.0000299 | 0.00086  | 0.45 | down | chr8  | 26778933  | 26780677  | 1744   | uc010lun                 |
| ASLNC10044 | 0.0000301 | 0.00086  | 0.27 | down | chr14 | 105205502 | 105210208 | 4706   | uc001ysb                 |
| ASLNC02086 | 0.0000311 | 0.000863 | 0.41 | down | chr20 | 22489193  | 22507280  | 18087  | NR_001558                |
| CD109474   | 0.0000436 | 0.00106  | 0.23 | down | chr20 | 50260588  | 50696687  | 436099 | HMLincRNA938             |
| ASLNC09954 | 0.0000462 | 0.00111  | 0.46 | down | chr13 | 29812417  | 29846036  | 33619  | uc001usu                 |
| ASLNC01482 | 0.0000463 | 0.00111  | 0.21 | down | chr11 | 1661075   | 1663435   | 2360   | NR_026642                |
| ASLNC07363 | 0.0000567 | 0.00126  | 0.41 | down | chr7  | 142204373 | 142209229 | 4856   | uc003wbg                 |
| ASLNC08526 | 0.0000569 | 0.00126  | 0.44 | down | chr10 | 11335759  | 11338633  | 2874   | uc001ikr                 |
| ASLNC11297 | 0.0000627 | 0.00134  | 0.46 | down | chr17 | 181935    | 183234    | 1299   | uc002frg                 |
| ASLNC19208 | 0.0000666 | 0.00138  | 0.44 | down | chr2  | 143802262 | 143804133 | 1871   | AK097114                 |
| ASLNC15327 | 0.0000667 | 0.00138  | 0.44 | down | chr22 | 35081351  | 35081844  | 493    | AF085963                 |
| ASLNC11181 | 0.00007   | 0.00142  | 0.3  | down | chr16 | 55273895  | 55275609  | 1714   | uc002ejz                 |
| ASLNC10063 | 0.0000738 | 0.00147  | 0.45 | down | chr14 | 105121113 | 105121750 | 637    | uc010axn                 |
| ASLNC02724 | 0.0000785 | 0.00154  | 0.2  | down | chr15 | 19974282  | 19974577  | 295    | HIV1713                  |
| ASLNC07196 | 0.0000805 | 0.00157  | 0.44 | down | chr7  | 142204822 | 142209229 | 4407   | uc003wbk                 |
| ASLNC06824 | 0.0000807 | 0.00157  | 0.4  | down | chr7  | 142199505 | 142201153 | 1648   | uc003wba                 |
| ASLNC09272 | 0.000083  | 0.0016   | 0.21 | down | chr11 | 1643402   | 1645661   | 2259   | uc009ycz                 |
| ASLNC08338 | 0.0000837 | 0.00161  | 0.32 | down | chr9  | 19119734  | 19139253  | 19519  | uc003znp                 |
| ASLNC09261 | 0.0001002 | 0.00183  | 0.43 | down | chr11 | 43921912  | 43925332  | 3420   | uc001mxv                 |



|            |           |         |      |      |       |           |           |        |                          |
|------------|-----------|---------|------|------|-------|-----------|-----------|--------|--------------------------|
| ASLNC07042 | 0.0001006 | 0.00184 | 0.48 | down | chr7  | 141943612 | 142209229 | 265617 | uc003vzg                 |
| ASLNC24329 | 0.0001114 | 0.00199 | 0.27 | down | chr16 | 31984886  | 31985175  | 289    | DQ535378                 |
| CV403656   | 0.0001223 | 0.0021  | 0.38 | down | chr9  | 32935921  | 32936418  | 497    | chr9:32926300-32939200   |
| ASLNC23779 | 0.0001293 | 0.00218 | 0.37 | down | chr2  | 46411922  | 46412916  | 994    | BC070392                 |
| ASLNC17466 | 0.0001328 | 0.00221 | 0.47 | down | chr8  | 119151166 | 119153346 | 2180   | AK027368                 |
| ASLNC02187 | 0.0001333 | 0.00222 | 0.32 | down | chr22 | 20982462  | 21007324  | 24862  | NR_027293                |
| ASLNC16555 | 0.0001422 | 0.00231 | 0.39 | down | chr18 | 57704226  | 57705928  | 1702   | AK022150                 |
| ASLNC05648 | 0.0001469 | 0.00236 | 0.33 | down | chr4  | 187444245 | 187659145 | 214900 | uc003izb                 |
| ASLNC23659 | 0.000168  | 0.00258 | 0.33 | down | chr4  | 155703618 | 155705362 | 1744   | BC060040                 |
| ASLNC23537 | 0.0001687 | 0.00258 | 0.49 | down | chr19 | 56347992  | 56377034  | 29042  | BC045766                 |
| ASLNC11676 | 0.0001913 | 0.00278 | 0.49 | down | chr17 | 55271008  | 55273490  | 2482   | uc002ixv                 |
| ASLNC02723 | 0.0001958 | 0.00282 | 0.31 | down | chr14 | 105400454 | 106166467 | 766013 | HIV1712                  |
| CN413145   | 0.0002012 | 0.00288 | 0.29 | down | chr7  | 11203458  | 11328476  | 125018 | HMLincRNA1254            |
| ASLNC15668 | 0.000205  | 0.00292 | 0.44 | down | chr11 | 120566690 | 120567405 | 715    | AF143331                 |
| BE765125   | 0.0002057 | 0.00292 | 0.49 | down | chr9  | 32935726  | 32936242  | 516    | chr9:32926300-32939200   |
| ASLNC07117 | 0.0002144 | 0.003   | 0.4  | down | chr7  | 142194808 | 142201153 | 6345   | uc003was                 |
| ASLNC16767 | 0.0002224 | 0.00308 | 0.45 | down | chr3  | 115965803 | 115967651 | 1848   | AK023302                 |
| ASLNC13238 | 0.0002329 | 0.00316 | 0.47 | down | chrX  | 133506122 | 133508319 | 2197   | uc004exm                 |
| AA382174   | 0.0002396 | 0.00322 | 0.41 | down | chr1  | 148811560 | 148811880 | 320    | HMLincRNA1030            |
| ASLNC06839 | 0.0002589 | 0.00342 | 0.41 | down | chr7  | 142204811 | 142209229 | 4418   | uc003wbj                 |
| AI962686   | 0.0002648 | 0.00347 | 0.43 | down | chr17 | 10612214  | 10612999  | 785    | chr17:10598925-10629325  |
| ASLNC16259 | 0.0002727 | 0.00354 | 0.33 | down | chr15 | 59164337  | 59165867  | 1530   | AK021439                 |
| AA307003   | 0.000279  | 0.00357 | 0.22 | down | chr4  | 104396764 | 104594264 | 197500 | chr4:104483350-104521000 |
| ASLNC01548 | 0.0002814 | 0.00358 | 0.24 | down | chr12 | 9109039   | 9111918   | 2879   | NR_026971                |
| ASLNC24551 | 0.0002966 | 0.00374 | 0.54 | down | chr17 | 7418787   | 7420209   | 1422   | U79273                   |
| ASLNC02722 | 0.0002978 | 0.00375 | 0.3  | down | chr14 | 105401469 | 105862329 | 460860 | HIV1711                  |

|            |           |         |      |      |       |           |           |        |                         |
|------------|-----------|---------|------|------|-------|-----------|-----------|--------|-------------------------|
| ASLNC21888 | 0.0003002 | 0.00377 | 0.36 | down | chr5  | 35914174  | 35915458  | 1284   | AL713738                |
| ASLNC02728 | 0.0003112 | 0.00386 | 0.38 | down | chr14 | 105401469 | 105876550 | 475081 | HIV1718                 |
| ASLNC17908 | 0.0003136 | 0.00388 | 0.41 | down | chr17 | 14171376  | 14173516  | 2140   | AK057070                |
| ASLNC15759 | 0.0003154 | 0.00389 | 0.5  | down | chr5  | 142306317 | 142306854 | 537    | AF147424                |
| CR736960   | 0.0003184 | 0.00391 | 0.44 | down | chr17 | 10612035  | 10612503  | 468    | chr17:10598925-10629325 |
| ASLNC17636 | 0.0003221 | 0.00392 | 0.37 | down | chr1  | 162836509 | 162838570 | 2061   | AK055280                |
| DW417964   | 0.0003481 | 0.00413 | 0.33 | down | chr1  | 148808703 | 148808991 | 288    | HMlincRNA1030           |
| ASLNC17565 | 0.0003522 | 0.00417 | 0.41 | down | chr12 | 112012639 | 112014514 | 1875   | AK054946                |
| ASLNC21516 | 0.000353  | 0.00417 | 0.48 | down | chr6  | 42107548  | 42108910  | 1362   | AK130763                |
| ASLNC24104 | 0.0003561 | 0.00419 | 0.46 | down | chr19 | 13806330  | 13808103  | 1773   | BX640708                |
| ASLNC02727 | 0.0003607 | 0.00423 | 0.29 | down | chr14 | 105401841 | 105948960 | 547119 | HIV1717                 |
| ASLNC07050 | 0.0003636 | 0.00425 | 0.44 | down | chr7  | 142196804 | 142201153 | 4349   | uc003waz                |
| ASLNC10081 | 0.0003675 | 0.00428 | 0.48 | down | chr14 | 105241346 | 105241984 | 638    | uc001ysc                |
| ASLNC22002 | 0.0003833 | 0.00443 | 0.54 | down | chr9  | 68198838  | 68201492  | 2654   | AY343893                |
| ASLNC24125 | 0.0004187 | 0.0047  | 0.34 | down | chr2  | 88203624  | 88206504  | 2880   | BX641099                |
| AK297526   | 0.0004284 | 0.00477 | 0.23 | down | chr12 | 50702882  | 50739100  | 36218  | HMlincRNA602            |
| ASLNC21195 | 0.0004763 | 0.00517 | 0.54 | down | chr1  | 56768385  | 56769997  | 1612   | AK129996                |
| ASLNC17065 | 0.0004828 | 0.00522 | 0.32 | down | chr2  | 23202163  | 23203092  | 929    | AK024624                |
| ASLNC20094 | 0.0004919 | 0.00527 | 0.55 | down | chr13 | 47977202  | 47980894  | 3692   | AK125170                |
| DA905574   | 0.0005081 | 0.00537 | 0.28 | down | chr7  | 11199517  | 11233981  | 34464  | HMlincRNA1254           |
| ASLNC01997 | 0.0005985 | 0.00599 | 0.37 | down | chr19 | 46122009  | 46148405  | 26396  | NR_001278               |
| ASLNC03068 | 0.0006138 | 0.00608 | 0.47 | down | chr2  | 218632123 | 218634258 | 2135   | LIT2061                 |
| ASLNC07364 | 0.0006151 | 0.00608 | 0.5  | down | chr7  | 142127671 | 142201153 | 73482  | uc003waj                |
| ASLNC24140 | 0.0006463 | 0.00628 | 0.44 | down | chr9  | 111046567 | 111048934 | 2367   | BX647103                |
| ASLNC10468 | 0.0006534 | 0.00632 | 0.51 | down | chr15 | 94613004  | 94671581  | 58577  | uc010bol                |
| ASLNC10032 | 0.0006719 | 0.00642 | 0.36 | down | chr14 | 105280158 | 105285359 | 5201   | uc001ysg                |

|            |           |         |      |      |       |           |           |        |                         |
|------------|-----------|---------|------|------|-------|-----------|-----------|--------|-------------------------|
| ASLNC18865 | 0.0007192 | 0.00674 | 0.38 | down | chr4  | 23489922  | 23492694  | 2772   | AK095100                |
| ASLNC10248 | 0.0007209 | 0.00675 | 0.47 | down | chr14 | 21528480  | 22086559  | 558079 | uc001wco                |
| BI832838   | 0.0007487 | 0.00691 | 0.36 | down | chr1  | 148803932 | 148804517 | 585    | HMLincRNA1030           |
| ASLNC16821 | 0.0007941 | 0.00719 | 0.44 | down | chr2  | 46454078  | 46455821  | 1743   | AK023572                |
| ASLNC19405 | 0.0008094 | 0.0073  | 0.57 | down | chr16 | 70616440  | 70619063  | 2623   | AK098239                |
| BM043959   | 0.0008126 | 0.00731 | 0.4  | down | chr1  | 148808483 | 148809211 | 728    | HMLincRNA1030           |
| ASLNC18819 | 0.0008634 | 0.00768 | 0.53 | down | chr19 | 1336157   | 1340650   | 4493   | AK094875                |
| ASLNC15871 | 0.0008753 | 0.00775 | 0.37 | down | chr13 | 96802238  | 96804294  | 2056   | AF339768                |
| ASLNC12031 | 0.0008784 | 0.00777 | 0.44 | down | chr19 | 54707697  | 54721366  | 13669  | uc002pod                |
| ASLNC18277 | 0.0008797 | 0.00777 | 0.54 | down | chr9  | 76952426  | 76954167  | 1741   | AK091034                |
| AK096140   | 0.0008927 | 0.00785 | 0.23 | down | chr5  | 95213694  | 95221590  | 7896   | HMLincRNA417            |
| AA829056   | 0.0009419 | 0.00816 | 0.37 | down | chr1  | 148808383 | 148808828 | 445    | HMLincRNA1030           |
| ASLNC02729 | 0.0009594 | 0.00824 | 0.5  | down | chr14 | 101091638 | 101094924 | 3286   | HIV1721                 |
| BM678241   | 0.001066  | 0.00892 | 0.33 | down | chr17 | 66286339  | 66512229  | 225890 | chr17:66488275-66507650 |
| ASLNC23708 | 0.0011028 | 0.00914 | 0.54 | down | chr2  | 160508574 | 160509899 | 1325   | BC065212                |
| ASLNC17185 | 0.0011574 | 0.00945 | 0.42 | down | chr8  | 119158339 | 119160615 | 2276   | AK025143                |
| ASLNC08303 | 0.0011688 | 0.00952 | 0.51 | down | chr9  | 37495586  | 37500377  | 4791   | uc004aaa                |
| AW024518   | 0.0012086 | 0.0097  | 0.35 | down | chr1  | 67767900  | 67770600  | 2700   | HMLincRNA1286           |
| ASLNC01388 | 0.001212  | 0.00972 | 0.33 | down | chr10 | 4903860   | 4948465   | 44605  | NR_026743               |
| CA426679   | 0.0012722 | 0.01    | 0.46 | down | chr17 | 10612478  | 10613113  | 635    | chr17:10598925-10629325 |
| ASLNC24245 | 0.0012897 | 0.0101  | 0.42 | down | chr4  | 57617945  | 57626722  | 8777   | BX648756                |
| ASLNC19171 | 0.0013912 | 0.0107  | 0.52 | down | chr1  | 842817    | 846259    | 3442   | AK096928                |
| ASLNC07087 | 0.0014131 | 0.0109  | 0.46 | down | chr7  | 142205050 | 142210546 | 5496   | uc003wbn                |
| AA572879   | 0.0014415 | 0.011   | 0.4  | down | chr1  | 148808391 | 148808818 | 427    | HMLincRNA1030           |
| ASLNC21627 | 0.0014529 | 0.0111  | 0.57 | down | chr1  | 115678002 | 115680438 | 2436   | AK172772                |
| AA332648   | 0.0014882 | 0.0112  | 0.41 | down | chr9  | 32935966  | 32936232  | 266    | chr9:32926300-32939200  |

|            |           |        |      |      |       |           |           |        |                         |
|------------|-----------|--------|------|------|-------|-----------|-----------|--------|-------------------------|
| ASLNC18398 | 0.0015555 | 0.0116 | 0.61 | down | chr16 | 56366121  | 56368514  | 2393   | AK092013                |
| ASLNC23793 | 0.0015892 | 0.0118 | 0.42 | down | chr18 | 57626282  | 57627933  | 1651   | BC071787                |
| ASLNC06822 | 0.0016397 | 0.0121 | 0.45 | down | chr7  | 142203516 | 142209229 | 5713   | uc003wbd                |
| ASLNC10783 | 0.0016444 | 0.0121 | 0.4  | down | chr15 | 19974282  | 19974717  | 435    | uc001yuj                |
| ASLNC06934 | 0.0017099 | 0.0125 | 0.4  | down | chr7  | 142194692 | 142201153 | 6461   | uc003war                |
| AI525925   | 0.0017298 | 0.0126 | 0.54 | down | chr20 | 57182560  | 57182955  | 395    | chr20:57146000-57188600 |
| DA860017   | 0.0017529 | 0.0127 | 0.41 | down | chr14 | 52754179  | 53223726  | 469547 | chr14:52757725-52912850 |
| ASLNC18414 | 0.0017801 | 0.0129 | 0.45 | down | chr2  | 220127043 | 220128810 | 1767   | AK092118                |
| ASLNC04653 | 0.0017832 | 0.0129 | 0.37 | down | chr2  | 241542710 | 241555541 | 12831  | uc002waf                |
| ASLNC12692 | 0.0018359 | 0.0132 | 0.52 | down | chr21 | 45165393  | 45174016  | 8623   | uc002zgh                |
| ASLNC02721 | 0.0018438 | 0.0132 | 0.33 | down | chr14 | 105948664 | 105948956 | 292    | HIV1710                 |
| ASLNC03000 | 0.0019127 | 0.0135 | 0.55 | down | chr9  | 35647750  | 35648014  | 264    | LIT1758                 |
| ASLNC07188 | 0.0020229 | 0.0142 | 0.5  | down | chr7  | 27102267  | 27106109  | 3842   | uc003syg                |
| ASLNC19115 | 0.0020993 | 0.0146 | 0.49 | down | chr15 | 22828112  | 22830969  | 2857   | AK096584                |
| ASLNC24694 | 0.0021082 | 0.0146 | 0.52 | down | chr6  | 26022288  | 26022815  | 527    | Z83946                  |
| ASLNC15588 | 0.002152  | 0.0148 | 0.39 | down | chr8  | 105460828 | 105463912 | 3084   | AF090901                |
| ASLNC01769 | 0.0021526 | 0.0148 | 0.48 | down | chr16 | 54784029  | 54785938  | 1909   | NR_026889               |
| ASLNC06184 | 0.0021679 | 0.0149 | 0.42 | down | chr5  | 177310865 | 177317533 | 6668   | uc003mie                |
| ASLNC17085 | 0.0021934 | 0.015  | 0.57 | down | chr19 | 36519777  | 36521670  | 1893   | AK024852                |
| ASLNC09474 | 0.002197  | 0.015  | 0.57 | down | chr12 | 123964079 | 123964618 | 539    | uc009zyf                |
| ASLNC11235 | 0.0022104 | 0.0151 | 0.45 | down | chr16 | 33659897  | 33660388  | 491    | uc002eds                |
| BF895497   | 0.002245  | 0.0153 | 0.37 | down | chr19 | 7339554   | 7339788   | 234    | chr19:7320850-7339925   |
| ASLNC16667 | 0.0023846 | 0.0159 | 0.5  | down | chr6  | 42040803  | 42042487  | 1684   | AK022376                |
| ASLNC01754 | 0.002418  | 0.016  | 0.45 | down | chr16 | 29210041  | 29293098  | 83057  | NR_002939               |
| AW979087   | 0.0024412 | 0.0162 | 0.43 | down | chr1  | 148808376 | 148808867 | 491    | HMLincRNA1030           |
| ASLNC07931 | 0.0024675 | 0.0163 | 0.44 | down | chr9  | 42847906  | 42883134  | 35228  | uc004acq                |

|            |           |        |      |      |               |           |           |        |                          |
|------------|-----------|--------|------|------|---------------|-----------|-----------|--------|--------------------------|
| ASLNC01026 | 0.0025608 | 0.0168 | 0.56 | down | chr6_qb1_hap2 | 4266694   | 4283007   | 16313  | NR_001435                |
| ASLNC23764 | 0.0025721 | 0.0168 | 0.55 | down | chr9          | 37903051  | 37905658  | 2607   | BC069218                 |
| W05807     | 0.0026479 | 0.0171 | 0.29 | down | chr2          | 37570138  | 37686025  | 115887 | chr2:37629600-37715550   |
| ASLNC15172 | 0.0027167 | 0.0175 | 0.27 | down | chr1          | 112114817 | 112116714 | 1897   | AF070632                 |
| ASLNC18461 | 0.0027623 | 0.0177 | 0.44 | down | chr21         | 41790654  | 41792863  | 2209   | AK092554                 |
| DB558098   | 0.0028122 | 0.0179 | 0.28 | down | chr21         | 16925160  | 16925599  | 439    | chr21:16915600-16968019  |
| ASLNC20698 | 0.0028498 | 0.018  | 0.47 | down | chr20         | 61461783  | 61472973  | 11190  | AK127527                 |
| ASLNC08161 | 0.0028781 | 0.0181 | 0.51 | down | chr9          | 42855491  | 42883134  | 27643  | uc010mmy                 |
| ASLNC11243 | 0.0029469 | 0.0185 | 0.45 | down | chr16         | 31880823  | 31881055  | 232    | uc002ect                 |
| ASLNC14902 | 0.0029528 | 0.0185 | 0.49 | down | chr5          | 115832558 | 115834005 | 1447   | AB002438                 |
| ASLNC19575 | 0.0029852 | 0.0186 | 0.46 | down | chr1          | 206041489 | 206044048 | 2559   | AK123264                 |
| AA633838   | 0.0030204 | 0.0188 | 0.37 | down | chr1          | 148811427 | 148811845 | 418    | HMLincRNA1030            |
| ASLNC05891 | 0.0031128 | 0.0193 | 0.58 | down | chr5          | 148766633 | 148788430 | 21797  | uc003lqq                 |
| DB077273   | 0.0031228 | 0.0193 | 0.43 | down | chr2          | 107737032 | 107795236 | 58204  | chr2:107594300-107750025 |
| ASLNC18149 | 0.0032266 | 0.0198 | 0.55 | down | chr4          | 90422783  | 90424991  | 2208   | AK074440                 |
| DB324401   | 0.0032534 | 0.0199 | 0.49 | down | chr2          | 19100957  | 19101523  | 566    | chr2:19091050-19143450   |
| ASLNC17732 | 0.0032843 | 0.0201 | 0.51 | down | chr20         | 42418735  | 42421098  | 2363   | AK055783                 |
| ASLNC21099 | 0.0033724 | 0.0205 | 0.53 | down | chr7          | 130265507 | 130267505 | 1998   | AK129699                 |
| ASLNC15891 | 0.0034542 | 0.0209 | 0.6  | down | chr13         | 97727727  | 97728409  | 682    | AF339801                 |
| BP872601   | 0.0034571 | 0.0209 | 0.46 | down | chr7          | 79713672  | 79779708  | 66036  | chr7:79757325-79769550   |
| ASLNC17999 | 0.0034801 | 0.021  | 0.61 | down | chr4          | 8261190   | 8263373   | 2183   | AK057561                 |
| ASLNC24656 | 0.0034866 | 0.0211 | 0.43 | down | chr6          | 25907020  | 25919928  | 12908  | Y10513                   |
| ASLNC07232 | 0.0035955 | 0.0216 | 0.57 | down | chr7          | 142103175 | 142209229 | 106054 | uc003wad                 |
| ASLNC02726 | 0.0036531 | 0.0218 | 0.43 | down | chr14         | 105900639 | 105948945 | 48306  | HIV1716                  |
| ASLNC07618 | 0.0037317 | 0.0222 | 0.51 | down | chr8          | 80738880  | 80740951  | 2071   | uc003ybk                 |
| CA433797   | 0.0038717 | 0.0228 | 0.49 | down | chr14         | 65749284  | 66032796  | 283512 | chr14:65797475-66001975  |

|            |           |        |      |      |       |           |           |        |                          |
|------------|-----------|--------|------|------|-------|-----------|-----------|--------|--------------------------|
| ASLNC17446 | 0.0039145 | 0.0229 | 0.51 | down | chr16 | 20773749  | 20775847  | 2098   | AK027199                 |
| ASLNC01637 | 0.0039407 | 0.023  | 0.58 | down | chr14 | 101088312 | 101091766 | 3454   | NR_002770                |
| ASLNC23407 | 0.0040609 | 0.0235 | 0.51 | down | chr12 | 69204342  | 69207642  | 3300   | BC043182                 |
| ASLNC03131 | 0.0041221 | 0.0238 | 0.46 | down | chr19 | 15800756  | 15807226  | 6470   | LIT3336                  |
| ASLNC08469 | 0.0041232 | 0.0238 | 0.45 | down | chr10 | 99368551  | 99372506  | 3955   | uc001kof                 |
| ASLNC16850 | 0.0042262 | 0.0242 | 0.56 | down | chr5  | 167701272 | 167703399 | 2127   | AK023753                 |
| ASLNC19507 | 0.0042944 | 0.0245 | 0.52 | down | chr7  | 130359933 | 130362130 | 2197   | AK122774                 |
| ASLNC10340 | 0.0042947 | 0.0245 | 0.49 | down | chr14 | 22062413  | 22086559  | 24146  | uc001wft                 |
| ASLNC23700 | 0.0044937 | 0.0253 | 0.53 | down | chr1  | 85390767  | 85392474  | 1707   | BC064139                 |
| ASLNC10358 | 0.0045049 | 0.0254 | 0.52 | down | chr14 | 22074347  | 22086559  | 12212  | uc001wgf                 |
| ASLNC23689 | 0.0045775 | 0.0257 | 0.58 | down | chr21 | 34401692  | 34403975  | 2283   | BC063139                 |
| AA936595   | 0.0045982 | 0.0258 | 0.55 | down | chr2  | 43178387  | 43182844  | 4457   | chr2:43167775-43268825   |
| ASLNC19125 | 0.0046423 | 0.0259 | 0.63 | down | chr16 | 66272177  | 66275119  | 2942   | AK096635                 |
| ASLNC03153 | 0.0046618 | 0.026  | 0.54 | down | chr7  | 155285494 | 155294527 | 9033   | LIT3481                  |
| ASLNC10141 | 0.0046919 | 0.0261 | 0.49 | down | chr14 | 101093399 | 101096493 | 3094   | uc001ykh                 |
| ASLNC08074 | 0.0047171 | 0.0262 | 0.46 | down | chr9  | 66944086  | 66979312  | 35226  | uc004aen                 |
| ASLNC18679 | 0.0047177 | 0.0262 | 0.4  | down | chr15 | 59134331  | 59136802  | 2471   | AK094258                 |
| ASLNC21218 | 0.0048088 | 0.0265 | 0.55 | down | chr12 | 56517142  | 56523811  | 6669   | AK130110                 |
| ASLNC01469 | 0.004852  | 0.0268 | 0.53 | down | chr11 | 66841885  | 66915734  | 73849  | NR_024469                |
| ASLNC19173 | 0.0050023 | 0.0274 | 0.54 | down | chr2  | 241274423 | 241277212 | 2789   | AK096937                 |
| ASLNC07761 | 0.0051404 | 0.0279 | 0.62 | down | chr8  | 12438958  | 12567502  | 128544 | uc003wvy                 |
| ASLNC12290 | 0.0052113 | 0.0282 | 0.58 | down | chr19 | 46651913  | 46698399  | 46486  | uc002orb                 |
| BF759844   | 0.0053105 | 0.0287 | 0.55 | down | chr7  | 155980128 | 155980460 | 332    | chr7:155933475-155996100 |
| ASLNC16271 | 0.0053356 | 0.0288 | 0.5  | down | chr1  | 162921158 | 162923422 | 2264   | AK021467                 |
| ASLNC18091 | 0.0053815 | 0.0289 | 0.56 | down | chr4  | 160046637 | 160048644 | 2007   | AK057981                 |
| ASLNC13025 | 0.0054915 | 0.0292 | 0.52 | down | chr22 | 19798896  | 19805980  | 7084   | uc002zuj                 |

|            |           |        |      |      |       |           |           |        |                           |
|------------|-----------|--------|------|------|-------|-----------|-----------|--------|---------------------------|
| ASLNC20049 | 0.0055253 | 0.0293 | 0.55 | down | chr8  | 102133457 | 102157655 | 24198  | AK124959                  |
| ASLNC11308 | 0.0056105 | 0.0296 | 0.5  | down | chr17 | 37036104  | 37045191  | 9087   | uc010cxq                  |
| ASLNC15675 | 0.0057618 | 0.0302 | 0.58 | down | chr3  | 112949354 | 112952671 | 3317   | AF143877                  |
| ASLNC21231 | 0.005779  | 0.0303 | 0.5  | down | chr18 | 44798040  | 44800145  | 2105   | AK130189                  |
| ASLNC21098 | 0.0057832 | 0.0303 | 0.61 | down | chr14 | 54317478  | 54319625  | 2147   | AK129698                  |
| ASLNC02233 | 0.0057953 | 0.0303 | 0.56 | down | chrX  | 133505073 | 133508326 | 3253   | NR_024607                 |
| ASLNC22463 | 0.005803  | 0.0303 | 0.54 | down | chr3  | 143215856 | 143224505 | 8649   | BC025982                  |
| ASLNC14962 | 0.0058225 | 0.0304 | 0.55 | down | chr8  | 11002131  | 11004128  | 1997   | AB073660                  |
| ASLNC23150 | 0.005839  | 0.0304 | 0.51 | down | chr8  | 107351656 | 107354179 | 2523   | BC040619                  |
| ASLNC24352 | 0.0058825 | 0.0306 | 0.49 | down | chr10 | 46555052  | 46556469  | 1417   | DQ786233                  |
| AI364598   | 0.0059538 | 0.0308 | 0.47 | down | chr1  | 148811556 | 148811942 | 386    | HMLincRNA1030             |
| ASLNC16527 | 0.0062498 | 0.032  | 0.54 | down | chr4  | 74336117  | 74337789  | 1672   | AK022086                  |
| AA858138   | 0.0063413 | 0.0323 | 0.55 | down | chr2  | 177771644 | 177772046 | 402    | HMLincRNA870              |
| ASLNC15942 | 0.0063581 | 0.0324 | 0.51 | down | chr3  | 46909290  | 46911554  | 2264   | AF495723                  |
| BF767775   | 0.0063875 | 0.0325 | 0.52 | down | chr4  | 152457498 | 152457800 | 302    | HMLincRNA1014             |
| DB074989   | 0.0066627 | 0.0335 | 0.37 | down | chr2  | 37465164  | 37692871  | 227707 | chr2:37629600-37715550    |
| ASLNC04837 | 0.0066812 | 0.0335 | 0.6  | down | chr2  | 114014104 | 114016712 | 2608   | uc002tjx                  |
| ASLNC12871 | 0.0067192 | 0.0336 | 0.59 | down | chr22 | 41281290  | 41307961  | 26671  | uc003bcs                  |
| ASLNC21223 | 0.0067577 | 0.0338 | 0.58 | down | chr12 | 23670891  | 23673346  | 2455   | AK130118                  |
| BG477047   | 0.0068575 | 0.0342 | 0.44 | down | chr11 | 127638146 | 127680648 | 42502  | chr11:127666200-127694325 |
| ASLNC16295 | 0.0068613 | 0.0342 | 0.6  | down | chr10 | 13729754  | 13731675  | 1921   | AK021524                  |
| ASLNC14379 | 0.006918  | 0.0345 | 0.58 | down | chr1  | 89994815  | 89997411  | 2596   | AL133652                  |
| ASLNC04531 | 0.0070657 | 0.035  | 0.34 | down | chr2  | 34756150  | 34801365  | 45215  | uc002rpe                  |
| ASLNC04435 | 0.0070774 | 0.035  | 0.53 | down | chr2  | 130440634 | 130454515 | 13881  | uc002tpw                  |
| ASLNC17321 | 0.007122  | 0.0352 | 0.62 | down | chr6  | 109054040 | 109055355 | 1315   | AK026286                  |
| ASLNC09842 | 0.007402  | 0.0363 | 0.47 | down | chr13 | 21513113  | 21748657  | 235544 | uc001uoi                  |

|            |           |        |      |      |       |           |           |        |                          |
|------------|-----------|--------|------|------|-------|-----------|-----------|--------|--------------------------|
| ASLNC02824 | 0.0074902 | 0.0366 | 0.59 | down | chr11 | 1972983   | 1974511   | 1528   | HIV2496                  |
| AI914372   | 0.0076054 | 0.037  | 0.56 | down | chr2  | 114317329 | 114355962 | 38633  | chr2:114283350-114336075 |
| ASLNC20331 | 0.0077477 | 0.0375 | 0.55 | down | chr4  | 8294511   | 8296504   | 1993   | AK126123                 |
| ASLNC21523 | 0.0077765 | 0.0376 | 0.59 | down | chr7  | 36544156  | 36546022  | 1866   | AK130782                 |
| ASLNC15104 | 0.007787  | 0.0376 | 0.52 | down | chr16 | 83956534  | 83957845  | 1311   | AF052103                 |
| ASLNC15055 | 0.0078253 | 0.0377 | 0.58 | down | chr5  | 9210256   | 9210593   | 337    | AF009279                 |
| BG323747   | 0.0079999 | 0.0383 | 0.56 | down | chr12 | 1510304   | 1619404   | 109100 | chr12:1511350-1531175    |
| ASLNC15598 | 0.0080437 | 0.0384 | 0.6  | down | chr10 | 88833213  | 88835085  | 1872   | AF090918                 |
| ASLNC22790 | 0.0082487 | 0.0392 | 0.61 | down | chr21 | 44592077  | 44592606  | 529    | BC035333                 |
| ASLNC16053 | 0.0084116 | 0.0399 | 0.57 | down | chr6  | 107272019 | 107281693 | 9674   | AJ420564                 |
| ASLNC12152 | 0.0084859 | 0.0401 | 0.59 | down | chr19 | 7759263   | 7761065   | 1802   | uc002mim                 |
| ASLNC01762 | 0.0085082 | 0.0402 | 0.46 | down | chr16 | 55208873  | 55210231  | 1358   | NR_001447                |
| exon4582   | 0.0087078 | 0.0409 | 0.5  | down | chr9  | 125146233 | 125146501 | 268    | chr9:125140075-125157500 |
| BC036122   | 0.0087839 | 0.0411 | 0.54 | down | chr1  | 89871218  | 90002649  | 131431 | chr1:89972700-89985275   |
| AW856643   | 0.0090637 | 0.0421 | 0.52 | down | chr1  | 148809244 | 148809633 | 389    | HMLincRNA1030            |
| BM992765   | 0.0090779 | 0.0421 | 0.5  | down | chr1  | 148804911 | 148805524 | 613    | HMLincRNA1030            |
| ASLNC25050 | 0.0092915 | 0.0429 | 0.49 | down | chr13 | 96806820  | 96807071  | 251    | uc.356+                  |
| AI376835   | 0.0094475 | 0.0435 | 0.43 | down | chr2  | 16131738  | 16138690  | 6952   | HMLincRNA296             |
| ASLNC02827 | 0.0094902 | 0.0436 | 0.35 | down | chr11 | 1973038   | 1974440   | 1402   | HIV2503                  |
| BG779924   | 0.0095271 | 0.0437 | 0.52 | down | chr8  | 57125554  | 57126329  | 775    | HMLincRNA1074            |
| ASLNC16276 | 0.0095321 | 0.0437 | 0.45 | down | chr11 | 66206827  | 66209310  | 2483   | AK021479                 |
| BI001709   | 0.0096205 | 0.044  | 0.61 | down | chr2  | 177771658 | 177772015 | 357    | HMLincRNA870             |
| ASLNC11520 | 0.009699  | 0.0442 | 0.55 | down | chr17 | 37036104  | 37049977  | 13873  | uc002hxi                 |
| ASLNC08321 | 0.0099486 | 0.0451 | 0.59 | down | chr9  | 115893738 | 115901328 | 7590   | uc004big                 |
| BQ707656   | 0.0100257 | 0.0453 | 0.53 | down | chr1  | 171011667 | 171299750 | 288083 | chr1:171117525-171191468 |
| ASLNC23542 | 0.0100901 | 0.0455 | 0.55 | down | chr7  | 130270151 | 130271367 | 1216   | BC046210                 |



|            |           |        |      |      |       |           |           |        |                          |
|------------|-----------|--------|------|------|-------|-----------|-----------|--------|--------------------------|
| AK091430   | 0.0100924 | 0.0455 | 0.61 | down | chrX  | 109326293 | 109570114 | 243821 | chrX:109471950-109537553 |
| ASLNC18449 | 0.0101735 | 0.0457 | 0.6  | down | chr17 | 16258562  | 16260728  | 2166   | AK092443                 |
| ASLNC07696 | 0.0103102 | 0.0462 | 0.43 | down | chr8  | 9219970   | 9230000   | 10030  | uc003wsq                 |
| ASLNC11311 | 0.0103526 | 0.0463 | 0.52 | down | chr17 | 13620873  | 13636592  | 15719  | uc002goc                 |
| ASLNC16530 | 0.010797  | 0.0478 | 0.6  | down | chr1  | 162970649 | 162972408 | 1759   | AK022093                 |
| ASLNC17897 | 0.0108007 | 0.0478 | 0.62 | down | chr11 | 113436236 | 113437471 | 1235   | AK056988                 |
| AI431896   | 0.0108366 | 0.0479 | 0.56 | down | chr2  | 150152574 | 150412993 | 260419 | HMLincRNA854             |
| ASLNC14222 | 0.0110579 | 0.0485 | 0.58 | down | chr20 | 23109580  | 23110378  | 798    | CR626211                 |
| ASLNC16121 | 0.011088  | 0.0486 | 0.58 | down | chr4  | 152311825 | 152313971 | 2146   | AK000802                 |
| ASLNC23197 | 0.0111012 | 0.0486 | 0.54 | down | chr15 | 58658577  | 58660864  | 2287   | BC040965                 |
| ASLNC15046 | 0.0111062 | 0.0486 | 0.56 | down | chr5  | 11293478  | 11294508  | 1030   | AF009270                 |
| N54862     | 0.0116475 | 0.0504 | 0.53 | down | chrX  | 63987315  | 63987654  | 339    | chrX:63958875-64010675   |
| AA164731   | 0.0116845 | 0.0504 | 0.57 | down | chr17 | 44078944  | 44079384  | 440    | HMLincRNA268             |
| ASLNC00596 | 0.0117297 | 0.0505 | 0.42 | down | chr1  | 113267494 | 113268818 | 1324   | NR_002796                |
| CV403658   | 0.0117302 | 0.0505 | 0.47 | down | chr9  | 32935850  | 32936456  | 606    | chr9:32926300-32939200   |
| ASLNC21865 | 0.0118773 | 0.051  | 0.36 | down | chr16 | 57298537  | 57299029  | 492    | AL360255                 |
| ASLNC23559 | 0.0119309 | 0.0512 | 0.59 | down | chr16 | 965761    | 971591    | 5830   | BC047239                 |
| ASLNC17304 | 0.0119698 | 0.0512 | 0.56 | down | chr4  | 111186454 | 111187927 | 1473   | AK026192                 |
| ASLNC08027 | 0.0122371 | 0.0521 | 0.59 | down | chr9  | 130287600 | 130289885 | 2285   | uc004bvg                 |
| ASLNC21152 | 0.0124058 | 0.0527 | 0.48 | down | chr4  | 23481679  | 23483485  | 1806   | AK129851                 |
| ASLNC07204 | 0.0124738 | 0.0529 | 0.5  | down | chr7  | 100395448 | 100397831 | 2383   | uc010lhn                 |
| DA636405   | 0.0124928 | 0.0529 | 0.6  | down | chr2  | 16044742  | 16045313  | 571    | HMLincRNA297             |
| AW969510   | 0.0125862 | 0.0533 | 0.62 | down | chr19 | 12751245  | 12751673  | 428    | HMLincRNA1474            |
| ASLNC10132 | 0.0125895 | 0.0533 | 0.49 | down | chr14 | 60839501  | 60859289  | 19788  | uc001xfm                 |
| ASLNC15785 | 0.0127933 | 0.054  | 0.62 | down | chr1  | 158146507 | 158146968 | 461    | AF161344                 |
| ASLNC08728 | 0.0128114 | 0.054  | 0.62 | down | chr10 | 72245721  | 72250246  | 4525   | uc001jrl                 |

|            |           |        |      |      |       |           |           |       |                          |
|------------|-----------|--------|------|------|-------|-----------|-----------|-------|--------------------------|
| ASLNC23977 | 0.013145  | 0.0551 | 0.59 | down | chr17 | 40338605  | 40338848  | 243   | BC127920                 |
| ASLNC01684 | 0.0132237 | 0.0552 | 0.64 | down | chr15 | 82848741  | 82861082  | 12341 | NR_003246                |
| BG777151   | 0.0133417 | 0.0556 | 0.37 | down | chr8  | 6533147   | 6553096   | 19949 | chr8:6541450-6552025     |
| ASLNC07538 | 0.0133661 | 0.0556 | 0.63 | down | chr8  | 12040340  | 12075059  | 34719 | uc003wvd                 |
| ASLNC18906 | 0.0134475 | 0.0559 | 0.47 | down | chr13 | 110064242 | 110066701 | 2459  | AK095260                 |
| ASLNC17952 | 0.0135115 | 0.0561 | 0.56 | down | chr7  | 5380849   | 5382846   | 1997  | AK057263                 |
| T12556     | 0.0136403 | 0.0565 | 0.54 | down | chr9  | 136584404 | 136585564 | 1160  | chr9:136571925-136590625 |
| ASLNC15461 | 0.0136841 | 0.0566 | 0.64 | down | chr15 | 99428054  | 99428535  | 481   | AF086335                 |
| ASLNC22214 | 0.014007  | 0.0575 | 0.56 | down | chr1  | 202647155 | 202648167 | 1012  | BC009873                 |
| ASLNC01984 | 0.0141259 | 0.0579 | 0.58 | down | chr19 | 15800756  | 15807231  | 6475  | NR_015379                |
| exon4143   | 0.0143344 | 0.0584 | 0.56 | down | chr8  | 37396846  | 37397140  | 294   | chr8:37377750-37470000   |
| AI700526   | 0.0143594 | 0.0585 | 0.56 | down | chr3  | 71786327  | 71786738  | 411   | chr3:71738000-71797250   |
| ASLNC06133 | 0.0143731 | 0.0585 | 0.56 | down | chr5  | 1226255   | 1231720   | 5465  | uc003jbv                 |
| T94317     | 0.0144104 | 0.0586 | 0.6  | down | chr14 | 30804475  | 30804740  | 265   | HMLincRNA313             |
| ASLNC08349 | 0.0146189 | 0.0591 | 0.4  | down | chr9  | 66944086  | 66971724  | 27638 | uc004aem                 |
| BG898852   | 0.0146274 | 0.0591 | 0.52 | down | chr12 | 68760515  | 68761020  | 505   | chr12:68755950-68789750  |
| ASLNC14831 | 0.0148397 | 0.0596 | 0.67 | down | chr14 | 101093394 | 101096497 | 3103  | BC037351                 |
| ASLNC24398 | 0.0148578 | 0.0596 | 0.63 | down | chr3  | 52010774  | 52011373  | 599   | L13433                   |
| ASLNC00771 | 0.0149553 | 0.0599 | 0.58 | down | chr3  | 38139204  | 38153737  | 14533 | NR_024024                |
| ASLNC07635 | 0.01501   | 0.0601 | 0.5  | down | chr8  | 119166914 | 119169679 | 2765  | uc003yol                 |
| ASLNC24634 | 0.0151811 | 0.0606 | 0.58 | down | chr19 | 9232729   | 9233201   | 472   | X89673                   |
| ASLNC16098 | 0.0152943 | 0.0609 | 0.62 | down | chr13 | 27433055  | 27433833  | 778   | AK000205                 |
| ASLNC20459 | 0.0153278 | 0.061  | 0.63 | down | chr17 | 3728868   | 3730768   | 1900  | AK126617                 |
| BI011154   | 0.0155466 | 0.0616 | 0.47 | down | chr1  | 148805281 | 148805790 | 509   | HMLincRNA1030            |
| ASLNC02188 | 0.0157676 | 0.0621 | 0.47 | down | chr22 | 40866157  | 40870519  | 4362  | NR_002570                |
| BX109833   | 0.0158026 | 0.0622 | 0.6  | down | chr17 | 10600246  | 10600952  | 706   | chr17:10598925-10629325  |

|            |           |        |      |      |       |           |           |       |                         |
|------------|-----------|--------|------|------|-------|-----------|-----------|-------|-------------------------|
| ASLNC14618 | 0.0158602 | 0.0624 | 0.6  | down | chr21 | 45728458  | 45729236  | 778   | BC013148                |
| ASLNC24350 | 0.0161534 | 0.0632 | 0.62 | down | chr4  | 9408497   | 9409203   | 706   | DQ786220                |
| ASLNC08766 | 0.0163382 | 0.0637 | 0.61 | down | chr10 | 4917673   | 4924167   | 6494  | uc001ihn                |
| DA035282   | 0.0164212 | 0.064  | 0.59 | down | chr17 | 10573845  | 10612072  | 38227 | chr17:10598925-10629325 |
| ASLNC22487 | 0.0164688 | 0.0641 | 0.56 | down | chr12 | 103447796 | 103449373 | 1577  | BC027983                |
| ASLNC18117 | 0.0164946 | 0.0641 | 0.56 | down | chr8  | 42128446  | 42129438  | 992   | AK058085                |
| BG204263   | 0.016591  | 0.0644 | 0.5  | down | chr7  | 92322158  | 92384426  | 62268 | chr7:92340780-92489825  |
| ASLNC19615 | 0.0169636 | 0.0653 | 0.6  | down | chr11 | 8785056   | 8787982   | 2926  | AK123380                |
| ASLNC01454 | 0.0170687 | 0.0656 | 0.58 | down | chr11 | 65021808  | 65030513  | 8705  | NR_002819               |
| BG758151   | 0.0173371 | 0.0663 | 0.49 | down | chr12 | 19544329  | 19597645  | 53316 | chr12:19574525-19658050 |
| ASLNC02832 | 0.0173501 | 0.0663 | 0.59 | down | chr11 | 1953680   | 1956250   | 2570  | HIV2514                 |
| ASLNC16653 | 0.0173877 | 0.0663 | 0.58 | down | chr13 | 40068095  | 40069344  | 1249  | AK022351                |
| ASLNC19542 | 0.0174939 | 0.0666 | 0.64 | down | chr10 | 14610203  | 14612303  | 2100  | AK123138                |
| ASLNC17128 | 0.0179509 | 0.068  | 0.64 | down | chr4  | 16485201  | 16488328  | 3127  | AK024979                |
| ASLNC02144 | 0.0179845 | 0.068  | 0.63 | down | chr21 | 43706401  | 43722531  | 16130 | NR_026863               |
| ASLNC22607 | 0.0181265 | 0.0683 | 0.59 | down | chr11 | 110790177 | 110794121 | 3944  | BC031959                |
| ASLNC24385 | 0.0181616 | 0.0684 | 0.55 | down | chr5  | 41195112  | 41196000  | 888   | J05063                  |
| ASLNC14344 | 0.0181662 | 0.0684 | 0.62 | down | chr16 | 258726    | 272085    | 13359 | DQ656001                |
| ASLNC14724 | 0.0182967 | 0.0687 | 0.63 | down | chr4  | 22007921  | 22010046  | 2125  | BC020926                |
| ASLNC18330 | 0.0184277 | 0.0691 | 0.55 | down | chr8  | 30539986  | 30543393  | 3407  | AK091440                |
| ASLNC07642 | 0.0187978 | 0.0702 | 0.6  | down | chr8  | 128289292 | 128300515 | 11223 | uc003ysa                |
| ASLNC11101 | 0.019467  | 0.0721 | 0.61 | down | chr16 | 46947777  | 47039810  | 92033 | uc002efl                |
| ASLNC24625 | 0.0196133 | 0.0725 | 0.58 | down | chrX  | 152798458 | 152798753 | 295   | X78938                  |
| ASLNC03084 | 0.0196133 | 0.0725 | 0.6  | down | chr8  | 7091654   | 7092140   | 486   | LIT2085                 |
| ASLNC23881 | 0.0196988 | 0.0727 | 0.63 | down | chr20 | 10148059  | 10148402  | 343   | BC107086                |
| ASLNC24287 | 0.0202978 | 0.0746 | 0.64 | down | chr3  | 172558052 | 172561331 | 3279  | BX649038                |

---

|            |           |         |      |      |       |           |           |        |               |
|------------|-----------|---------|------|------|-------|-----------|-----------|--------|---------------|
| ASLNC12516 | 0.0203547 | 0.0747  | 0.59 | down | chr20 | 773766    | 786105    | 12339  | uc010fzz      |
| ASLNC06579 | 0.0204085 | 0.0748  | 0.63 | down | chr6  | 32228557  | 32230120  | 1563   | uc003n zv     |
| ASLNC15878 | 0.0207082 | 0.0753  | 0.53 | down | chr13 | 101167198 | 101168050 | 852    | AF339779      |
| ASLNC11303 | 0.0207809 | 0.0755  | 0.61 | down | chr17 | 4331072   | 4336496   | 5424   | uc002fxw      |
| ASLNC20833 | 0.0209855 | 0.0759  | 0.58 | down | chr11 | 47333461  | 47339247  | 5786   | AK128134      |
| T02980     | 0.0215853 | 0.0775  | 0.57 | down | chr22 | 25826979  | 25827503  | 524    | HMlincRNA1218 |
| ASLNC22001 | 0.0220849 | 0.0789  | 0.63 | down | chr12 | 18217     | 19669     | 1452   | AY341951      |
| ASLNC16193 | 0.0222837 | 0.0795  | 0.59 | down | chr4  | 57666847  | 57668938  | 2091   | AK001150      |
| ASLNC15455 | 0.0231599 | 0.0816  | 0.59 | down | chr11 | 57135161  | 57135619  | 458    | AF086318      |
| ASLNC16173 | 0.0249836 | 0.0859  | 0.57 | down | chr1  | 56803695  | 56809094  | 5399   | AK001092      |
| ASLNC17037 | 0.0280361 | 0.093   | 0.62 | down | chr19 | 8545978   | 8547054   | 1076   | AK024563      |
| ASLNC17464 | 0.0292888 | 0.0962  | 0.63 | down | chr6  | 154821136 | 154823043 | 1907   | AK027364      |
| ASLNC11173 | < 1e-07   | < 1e-07 | 0.16 | down | chr16 | 55227175  | 55228499  | 1324   | uc002ejp      |
| ASLNC10036 | < 1e-07   | < 1e-07 | 0.17 | down | chr14 | 105124270 | 105401515 | 277245 | uc001yrs      |

---

**Supplementary Table S4. List of possible miR503HG-interacting proteins identified by mass spectrometry**

| <b>Protein name</b>                                 | <b>Gene name</b> | <b>Molecular weight</b> | <b>PepCount</b> | <b>UniquePepCount</b> |
|-----------------------------------------------------|------------------|-------------------------|-----------------|-----------------------|
| Poly(rC)-binding protein 2                          | <i>PCBP2</i>     | 39                      | 17              | 6                     |
| ADP/ATP translocase 2                               | <i>SLC25A5</i>   | 33                      | 11              | 4                     |
| ADP/ATP translocase 1                               | <i>SLC25A4</i>   | 33                      | 10              | 4                     |
| Fructose-bisphosphate aldolase B                    | <i>ALDOB</i>     | 35                      | 6               | 3                     |
| Heterogeneous nuclear ribonucleoprotein A/B         | <i>HNRNPAB</i>   | 36                      | 6               | 2                     |
| L-lactate dehydrogenase B chain                     | <i>LDHB</i>      | 36                      | 6               | 1                     |
| Malate dehydrogenase                                | <i>MDH2</i>      | 36                      | 5               | 3                     |
| Heterogeneous nuclear ribonucleoproteins A2/B1      | <i>HNRNPA2B1</i> | 37                      | 4               | 1                     |
| Electron transfer flavoprotein subunit alpha        | <i>ETF A</i>     | 30                      | 4               | 1                     |
| Adenylate kinase 2                                  | <i>AK2</i>       | 26                      | 4               | 1                     |
| 3-hydroxyacyl-CoA dehydrogenase type-2              | <i>HSD17B10</i>  | 26                      | 4               | 1                     |
| Glutathione S-transferase A1                        | <i>GSTA1</i>     | 26                      | 4               | 1                     |
| Ezrin                                               | <i>EZR</i>       | 70                      | 3               | 2                     |
| Aspartate aminotransferase                          | <i>GOT2</i>      | 43                      | 3               | 2                     |
| Alcohol dehydrogenase [NADP(+)]                     | <i>AKR1A1</i>    | 37                      | 3               | 1                     |
| Fumarate hydratase                                  | <i>FH</i>        | 55                      | 3               | 1                     |
| 40S ribosomal protein S3a                           | <i>RPS3A</i>     | 35                      | 3               | 1                     |
| Serine-threonine kinase receptor-associated protein | <i>STRAP</i>     | 38                      | 3               | 1                     |
| Selenium-binding protein 1                          | <i>SELENBP1</i>  | 45                      | 2               | 1                     |
| Phosphoenolpyruvate carboxykinase                   | <i>PCK1</i>      | 69                      | 2               | 1                     |
| T-complex protein 1 subunit                         | <i>CCT7</i>      | 59                      | 2               | 1                     |
| Alpha-aminoacidic semialdehyde dehydrogenase        | <i>ALDH7A1</i>   | 55                      | 2               | 1                     |
| Glutathione synthetase                              | <i>GSS</i>       | 52                      | 1               | 1                     |
| Methylcrotonoyl-CoA carboxylase subunit alpha       | <i>MCCC1</i>     | 76                      | 1               | 1                     |
| Malate dehydrogenase                                | <i>MDH1</i>      | 36                      | 1               | 1                     |

**Supplementary Table S5. Oligonucleotide sequences in this study**

| <b>Gene</b>           | <b>Sequence</b>                                                          |
|-----------------------|--------------------------------------------------------------------------|
| 3'-RACE GSP1          | 5' CTGTAAGTCCAAGGAATCCTCTCCC 3'                                          |
| 3'-RACE GSP2          | 5' CCAAATGAGTCAGTCATGATGGGA 3'                                           |
| 5'-RACE GSP1          | 5' ACATTGACACACATCTGTTCA 3'                                              |
| 5'-RACE GSP2          | 5' TTCCCATCATGACTGACTCAT 3'                                              |
| miR503HG full length  | F: 5' GAAGGTAGAAGGTGGGGTCTG 3'<br>R: 5' TAACGGAAATCAAAAGCAGCA 3'         |
| miR503HG qPCR         | F: 5'CTTGAAGGCATCCAGCATCTC 3'<br>R: 5'TTGGGACACTTGGGTGGTTTT 3'           |
| miR503HG fragment1    | F: 5'GCCGGACGCGTGTTCCTGCCA 3'<br>R: 5'GCCGGATGGCGCGGGCTTGGT 3'           |
| miR503HG fragment2    | F:5'GCCTGCAGGACCCAGGAATGT 3'<br>R:5'GCCTTTGAGAGATGATTGTAT 3'             |
| miR503HG fragment3    | F:5'TTTATATGCATTTTAAAACTC 3'<br>R: 5'ACATTTTAAAGGATGTATAA 3'             |
| miR503HG fragment4    | F: 5' TGTTCCCCCATACCACACTT 3'<br>R: 5' CTGTGACCCTGGTTATTGACA 3'          |
| miR503HG fragment5    | F: 5' AAAGGCAGTGGTCACA ACTCT 3'<br>R: 5' AAAAGCAGCATA CAGTCATTC 3'       |
| U1 snRNA              | F: 5' GGGAGATACCATGATCACGAAGGT 3'<br>R: 5' CCACAAATTATGCAGTCGAGTTTCCC 3' |
| $\beta$ -actin        | F: 5' AGTTGCGTTACACCCTTCTTG 3'<br>R: 5' GCTGTCACCTTCACCGTTCC 3'          |
| HNRNPA2B1 full-length | F: 5' ATGGAGAGAGAAAAGGAAC 3'<br>R: 5' TCAGTATCGGCTCCTCCC 3'              |
| HNRNPA2B1 qPCR        | F: 5' GGAGTGGAAGAGGAGGCAAC 3'<br>R: 5' CAGGTCCTCCTCCATACCCA 3'           |

---

|                     |                                                                  |
|---------------------|------------------------------------------------------------------|
| HNRNPA2B1 fragment1 | F: 5' ATGGAGAGAGAAAAGGAACAG 3'<br>R: 5' TCAAGATCCTCCTCTAAAGTT 3' |
| HNRNPA2B1 fragment2 | F: 5' GATGGATATGGCAGTGGACGT 3'<br>R: 5' TCAGTATCGGCTCCTCCCACC 3' |
| JAK2                | F: 5' TGGGGTTTTCTGGTGCCTTT 3'<br>R: 5' TAGAGGGTCATACCGGCACA 3'   |
| STAT3               | F: 5' AGCAGCACCTTCAGGATGTC 3'<br>R: 5' GCATCTTCTGCCTGGTCACT 3'   |
| JNK                 | F: 5' GTTGGGTGCATCATGGGAGA 3'<br>R: 5' CGGGTGTTGGAGAGCTTCAT 3'   |
| ERK1/2              | F: 5' AACAGGCCCATCTTTCCAGG 3'<br>R: 5' CCAGAGCTTTGGAGTCAGCA 3'   |
| $\beta$ -catenin    | F: 5' ATGACTCGAGCTCAGAGGGT 3'<br>R: 5' ATTGCACGTGTGGCAAGTTC 3'   |
| p52                 | F: 5' CTACTIONGACTACGGCGTCAC 3'<br>R: 5' GAGTCTCCATGCCGATCCAG 3' |
| p65                 | F: 5' ATAGAAGAGCAGCGTGGGGA 3'<br>R: 5' GCCTGGTCCCGTGAAATACA 3'   |
| Abca1               | F: 5' GGAGGGAGAGCACAGGCTTT 3'<br>R: 5' GCTCGCAATTACGGGGTTTT 3'   |
| Cyp7a1              | F: 5' TTACAAGGCGGGACACACAG 3'<br>R: 5' GGAATGGTGTGTTGCTTGCGA 3'  |
| miR503 probe        | 5' UAGCAGCGGGAACAGUUCUGCAG3'                                     |
| miR503HG siRNA-1#   | 5' GGACAUUGAAUGACUGUAUTT 3'                                      |
| miR503HG siRNA-2#   | 5' GCAGUGGUCACAACUCUGUTT 3'                                      |
| HNRNPA2B1 siRNA     | 5' GAAAUACCAUACCAUCAAUTT 3'<br>5' AUUGAUGGUAUGGUAUUUCTT 3'       |
| siRNA control (NC)  | 5' UUCUCCGAACGUGUCACGUTT 3'                                      |

---

---

|                  |                               |
|------------------|-------------------------------|
|                  | 5' ACGUGACACGUUCGGAGAATT 3'   |
| miR503 mimics    | 5' UAGCAGCGGGAACAGUUCUGCAG 3' |
| miR503 inhibitor | 5' CUGCAGAACUGUCCCCGCUGCUA 3' |

---



**Supplementary Table S6. Antibodies used in this study**

| <b>Protein</b>          | <b>Cat no.</b> | <b>Company</b> | <b>source</b> | <b>KD</b> |
|-------------------------|----------------|----------------|---------------|-----------|
| HNRNPA2B1               | SC-374052      | Santa cruz     | Mouse         | 34-40     |
| HA                      | 3724           | CST            | Rabbit        | /         |
| p52                     | 4882           | CST            | Rabbit        | 52        |
| p65                     | sc-372         | Santa cruz     | Rabbit        | 65        |
| p-p65(S536)             | 3033s          | Santa cruz     | Rabbit        | 65        |
| JAK2                    | 17670-1-AP     | Proteintech    | Rabbit        | 125       |
| p-JAK2 (Tyr1007)        | 4406           | CST            | Rabbit        | 125       |
| STAT3                   | 10253-2-AP     | Proteintech    | Rabbit        | 86        |
| p-STAT3(S727)           | 9134P          | CST            | Rabbit        | 86        |
| JNK                     | 51151-1-AP     | Proteintech    | Rabbit        | 48        |
| p-JNK(Thr183/Tyr185)    | 4668           | CST            | Rabbit        | 48        |
| ERK1/2                  | 16443-1-AP     | Proteintech    | Rabbit        | 38-44     |
| p-ERK1/2(Thr202/Tyr204) | 4377           | CST            | Rabbit        | 44        |
| $\beta$ -catenin        | 17561-1-AP     | Proteintech    | Rabbit        | 92        |
| c-Myc                   | 5605           | CST            | Rabbit        | 57-65     |
| EZH2                    | 21800-1-AP     | Proteintech    | Rabbit        | 86        |
| COX2                    | ab52237        | abcam          | Rabbit        | 69        |
| VCAM1                   | sc-13160       | Santa cruz     | Mouse         | 95        |
| Lamin B1                | 13435          | CST            | Rabbit        | 68        |
| GAPDH                   | 5174           | CST            | Rabbit        | 37        |

---

|                |           |            |       |    |
|----------------|-----------|------------|-------|----|
| ARHGEF19       | sc-137301 | Santa cruz | Goat  | 89 |
| $\beta$ -actin | A5441     | Sigma      | Mouse | 43 |

---
